# Supplementary material for: Autophagy Activation Associates with Suppression of Prion Protein and Improved Mitochondrial Status in Glioblastoma Cells
Source: MDPI journal article supplement (doi:10.3390/cells12020221), 2023-01-04
Supplement: s1 [file s1]

## Supplementary Figures

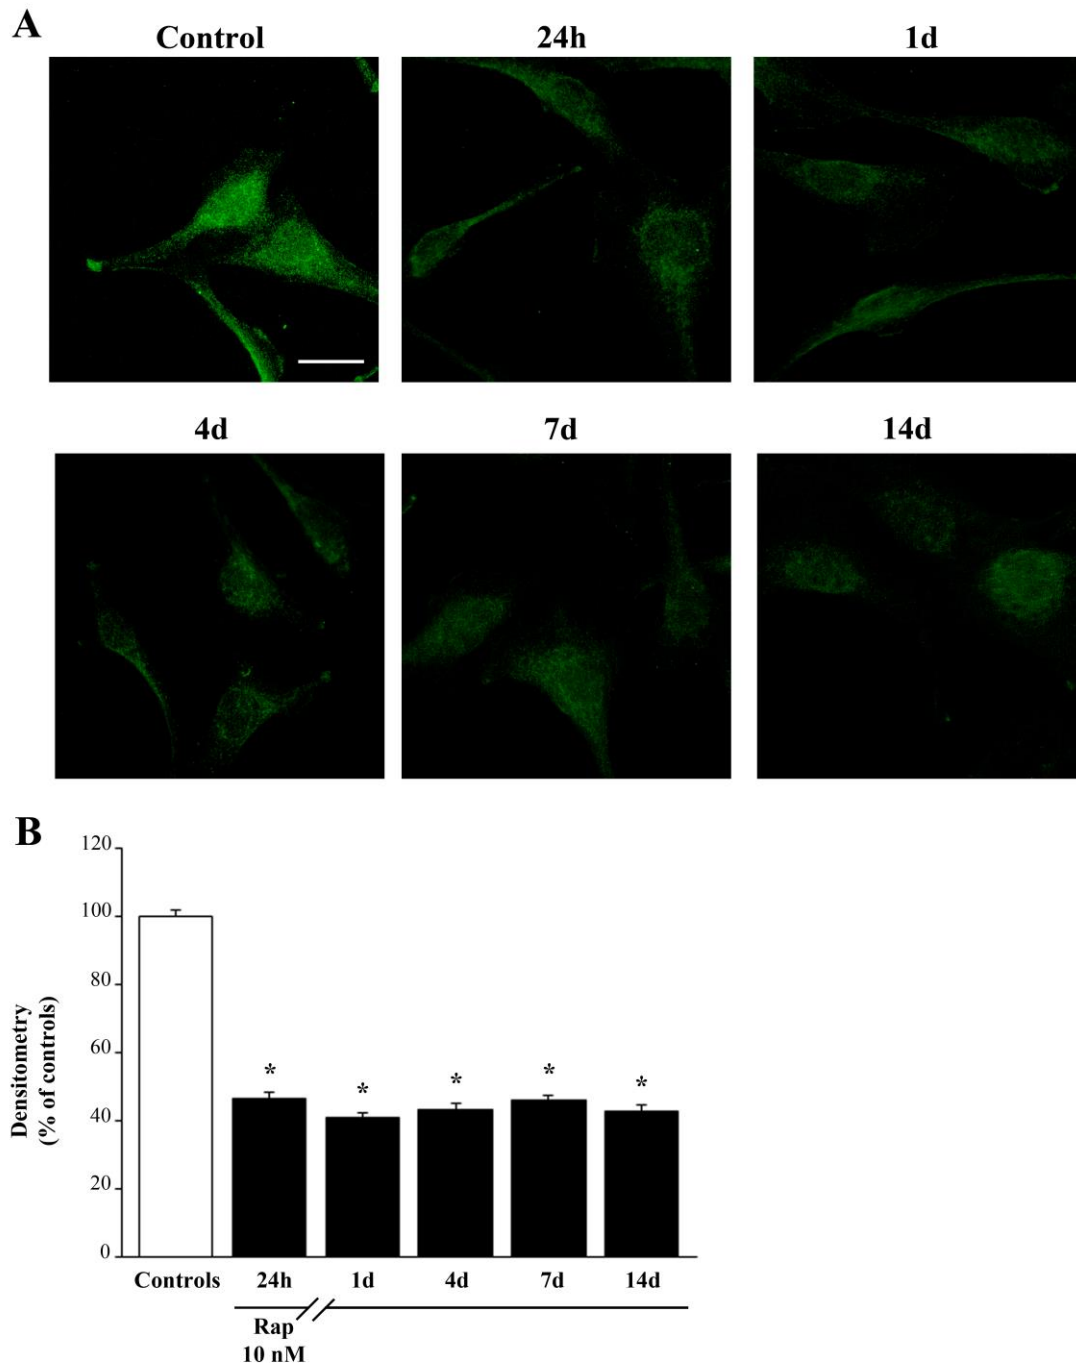

**Figure S1.** Rapamycin produces a long-lasting inhibition of mTOR activity in A172 cells. (A) Representative pictures showing the marked and long-lasting decrease of the immuno-fluorescence of the downstream enzymatic product of mTOR, PS6RP. The graph in (B), which reports the densitometry of the PS6RP immuno-fluorescence, demonstrates that rapamycin induces a massive mTOR inhibition, which lasts at least 14 days following rapamycin withdrawal. Data are given as the mean percentage $\pm$ S.E.M. of optical density measured in 100 cells per group (assuming controls as 100%). \* $p < 0.05$  compared with controls. Scale bar=16  $\mu$ m.

**A**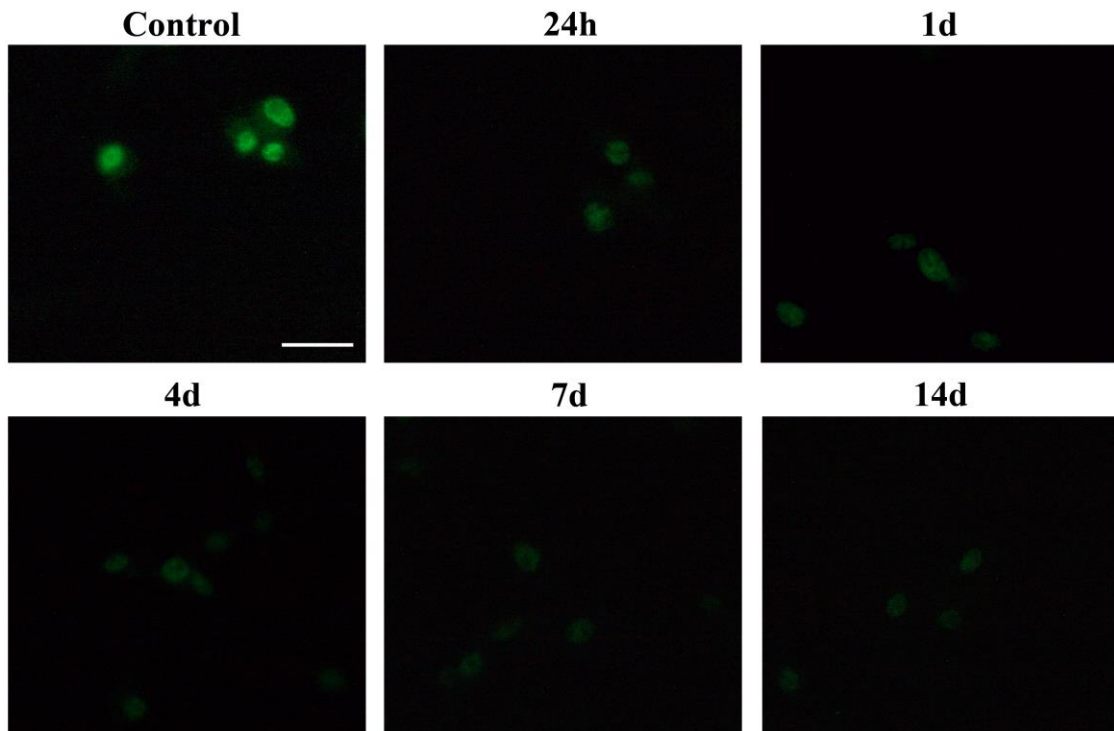**B**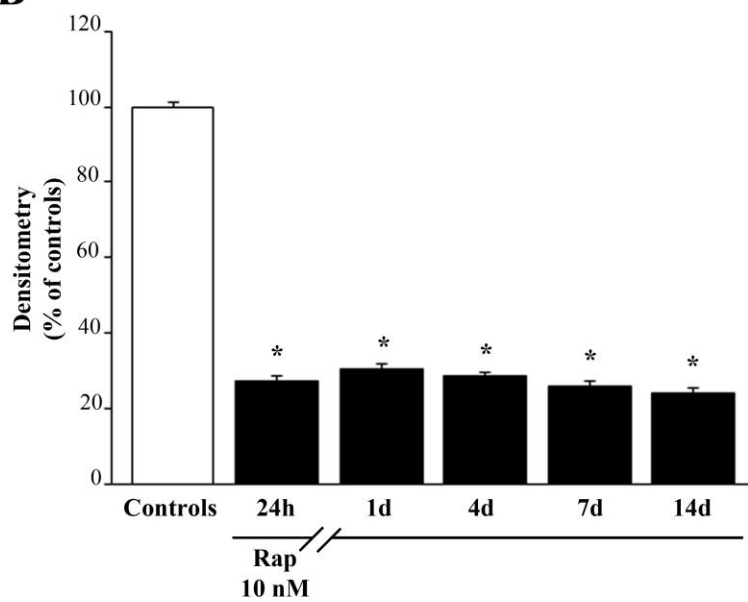

**Figure S2.** Rapamycin produces a long-lasting decrease of P70S6K immuno-fluorescence in U87MG cells. (A) Representative immuno-fluorescence of the P70S6K protein, the direct mTOR substrate, shows a marked and long-lasting decrease of the P70S6K staining produced by rapamycin. This is confirmed by the graph in (B), which reports the densitometry of the P70S6K immuno-fluorescence. Data are given as the mean percentage $\pm$ S.E.M. of optical density measured in 100 cells per group (assuming controls as 100%). \* $p < 0.05$  compared with controls. Scale bar=60  $\mu$ m.

**A**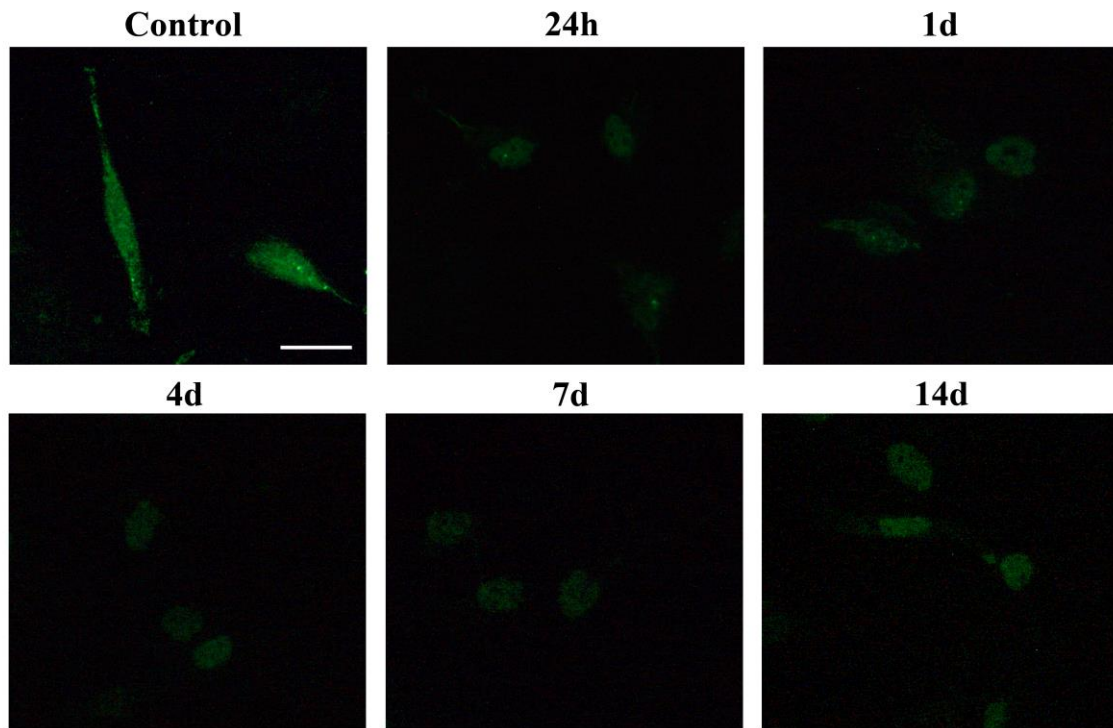**B**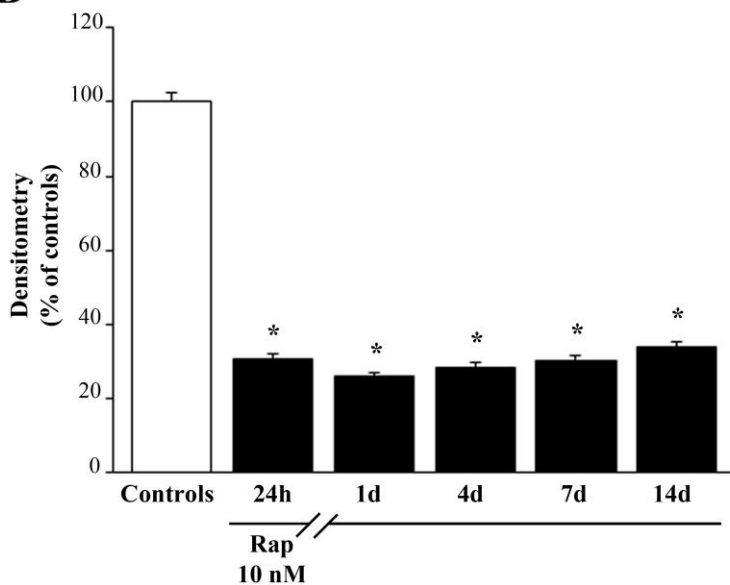

**Figure S3.** Rapamycin produces a long-lasting decrease of P70S6K immuno-fluorescence in A172 cells. (A) Representative immuno-fluorescence of the P70S6K protein, the direct mTOR substrate, shows a marked and long-lasting decrease of the P70S6K staining produced by rapamycin. This is confirmed by the graph in (B), which reports the densitometry of the P70S6K immuno-fluorescence. Data are given as the mean percentage $\pm$ S.E.M. of optical density measured in 100 cells per group (assuming controls as 100%). \* $p < 0.05$  compared with controls. Scale bar=34  $\mu$ m.

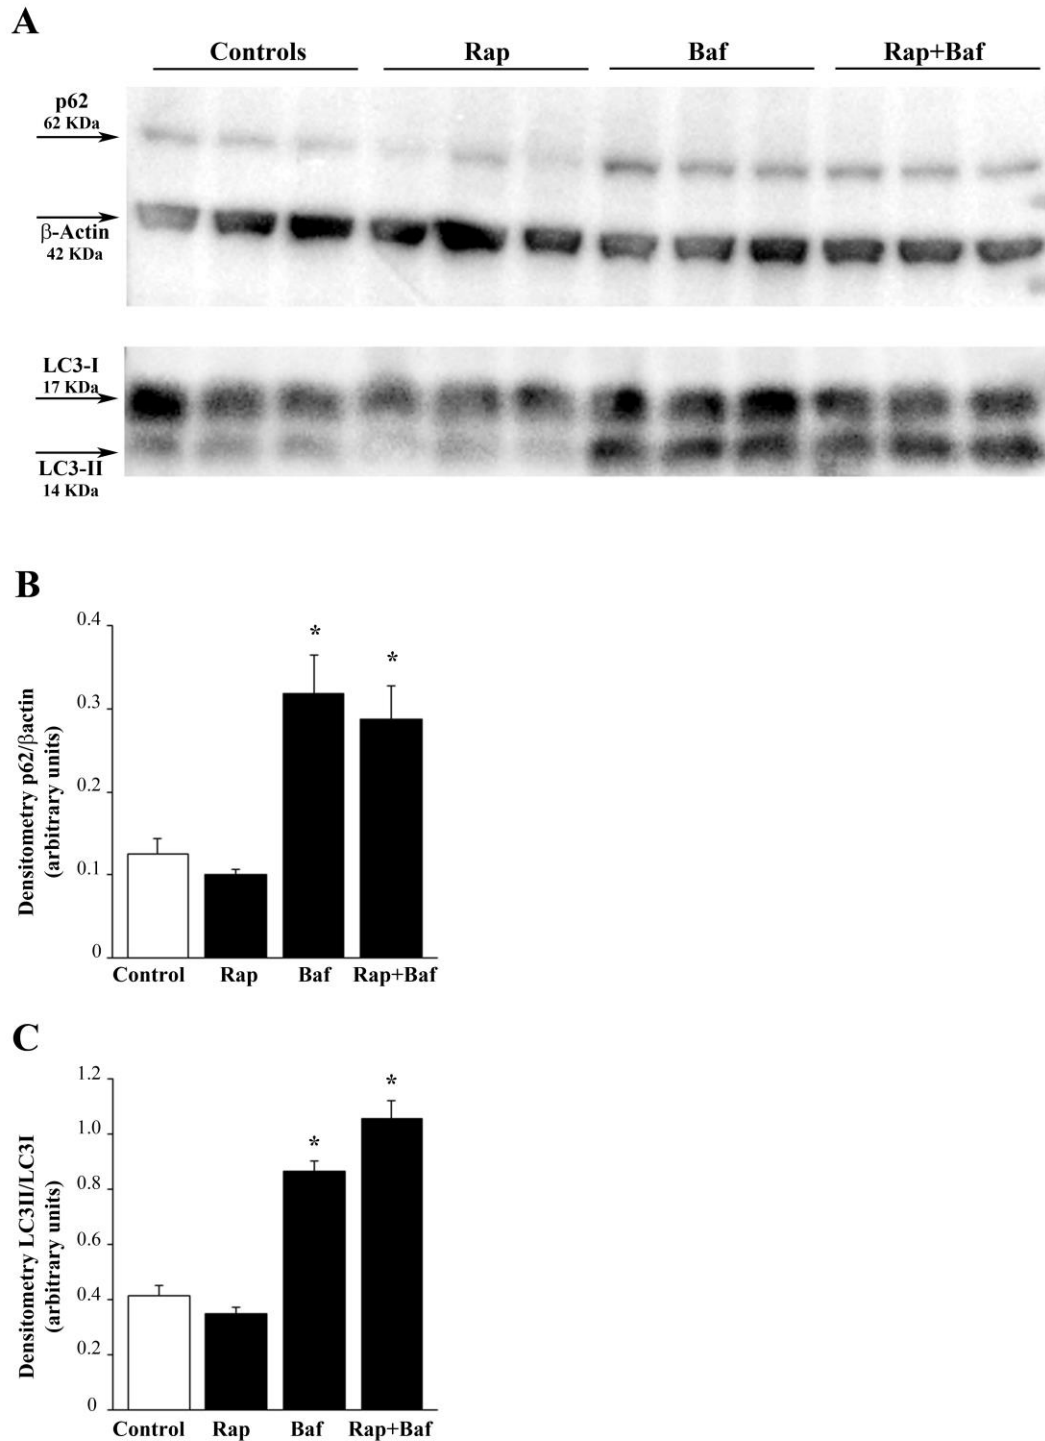

**Figure S4.** Rapamycin treatment increases the autophagy flux at 24h in A172 cells. (A) Western blot analysis of p62 and LC3-II in U87MG cells treated with 10 nM rapamycin for 24h; in some samples bafilomycin A1 (100 nM) was added during the last 3h in both untreated and rapamycin-treated cultures. Densitometric analysis of the level of p62 compared with the housekeeping  $\beta$ -actin (B) and LC3-II compared with LC3-I (C) are shown. Values are given as the mean  $\pm$  S.E.M. from three samples per experimental group. \* $p < 0.05$  compared with controls.

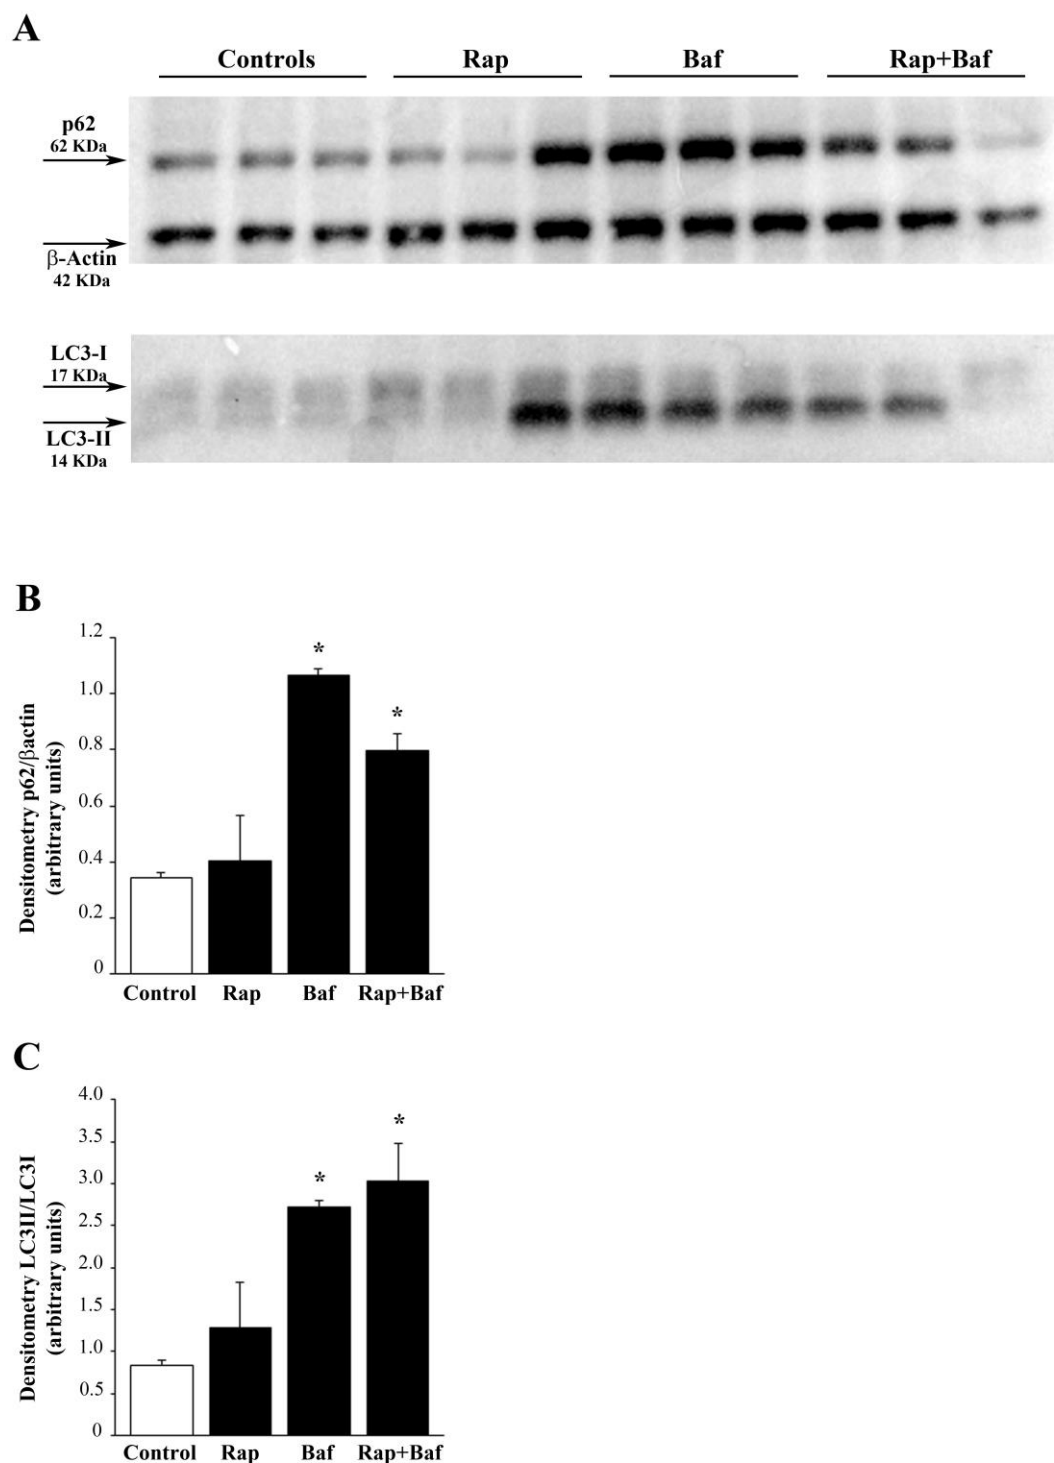

**Figure S5.** Rapamycin exerts long-lasting effects on the autophagy flux at 4 days from its withdrawal in A172 cells. (A) A172 cells were treated with 10 nM rapamycin and western blot analysis of p62 and LC3-II was performed 4 days after its removal; in some samples bafilomycin (100 nM) was added during the last 3h in both untreated and rapamycin-treated cultures. Densitometric analysis of the level of p62 compared with the housekeeping  $\beta$ -actin (B) and LC3-II compared with LC3-I (C) are shown. Values are given as the mean  $\pm$  S.E.M. from three samples per experimental group. \* $p < 0.05$  compared with controls.

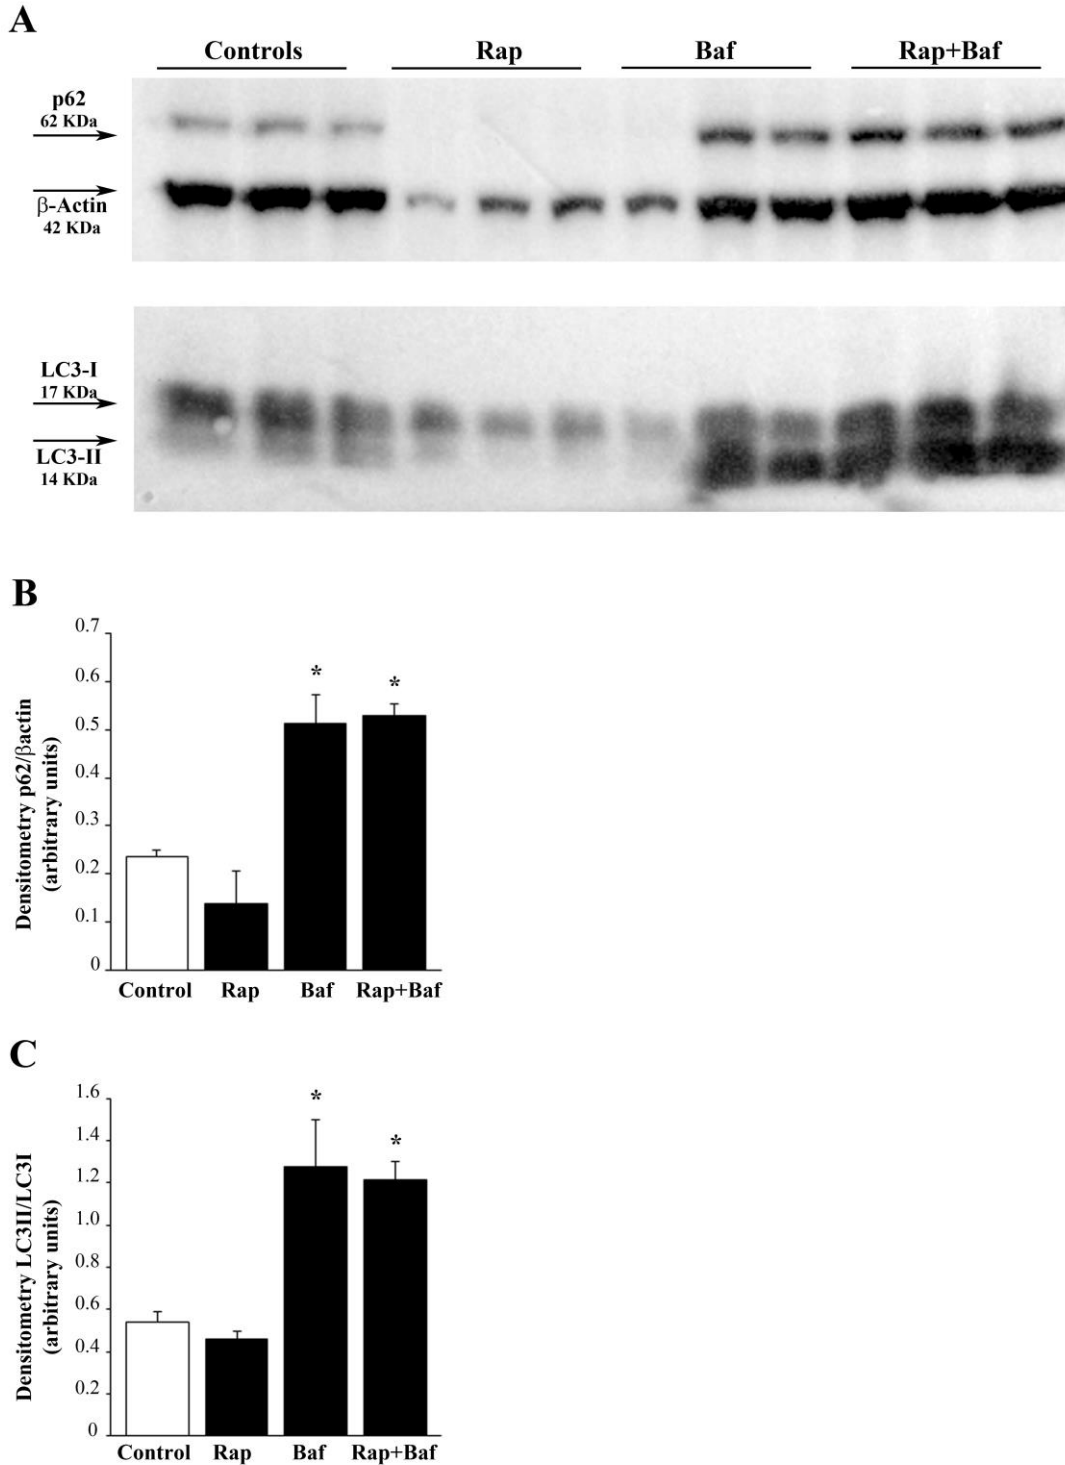

**Figure S6.** Rapamycin induces long-lasting effects on the autophagy flux at 7 days from its withdrawal in A172 cells. (A) A172 cells were treated with 10 nM rapamycin and western blot analysis of p62 and LC3-II was performed 7 days after its removal; in some samples bafilomycin (100 nM) was added during the last 3 h in both untreated and rapamycin-treated cultures. Densitometric analysis of the level of p62 compared with the housekeeping  $\beta$ -actin (B) and LC3-II compared with LC3-I (C) are shown. Values are given as the mean $\pm$ S.E.M. from three samples per experimental group. \* $p < 0.05$  compared with controls.

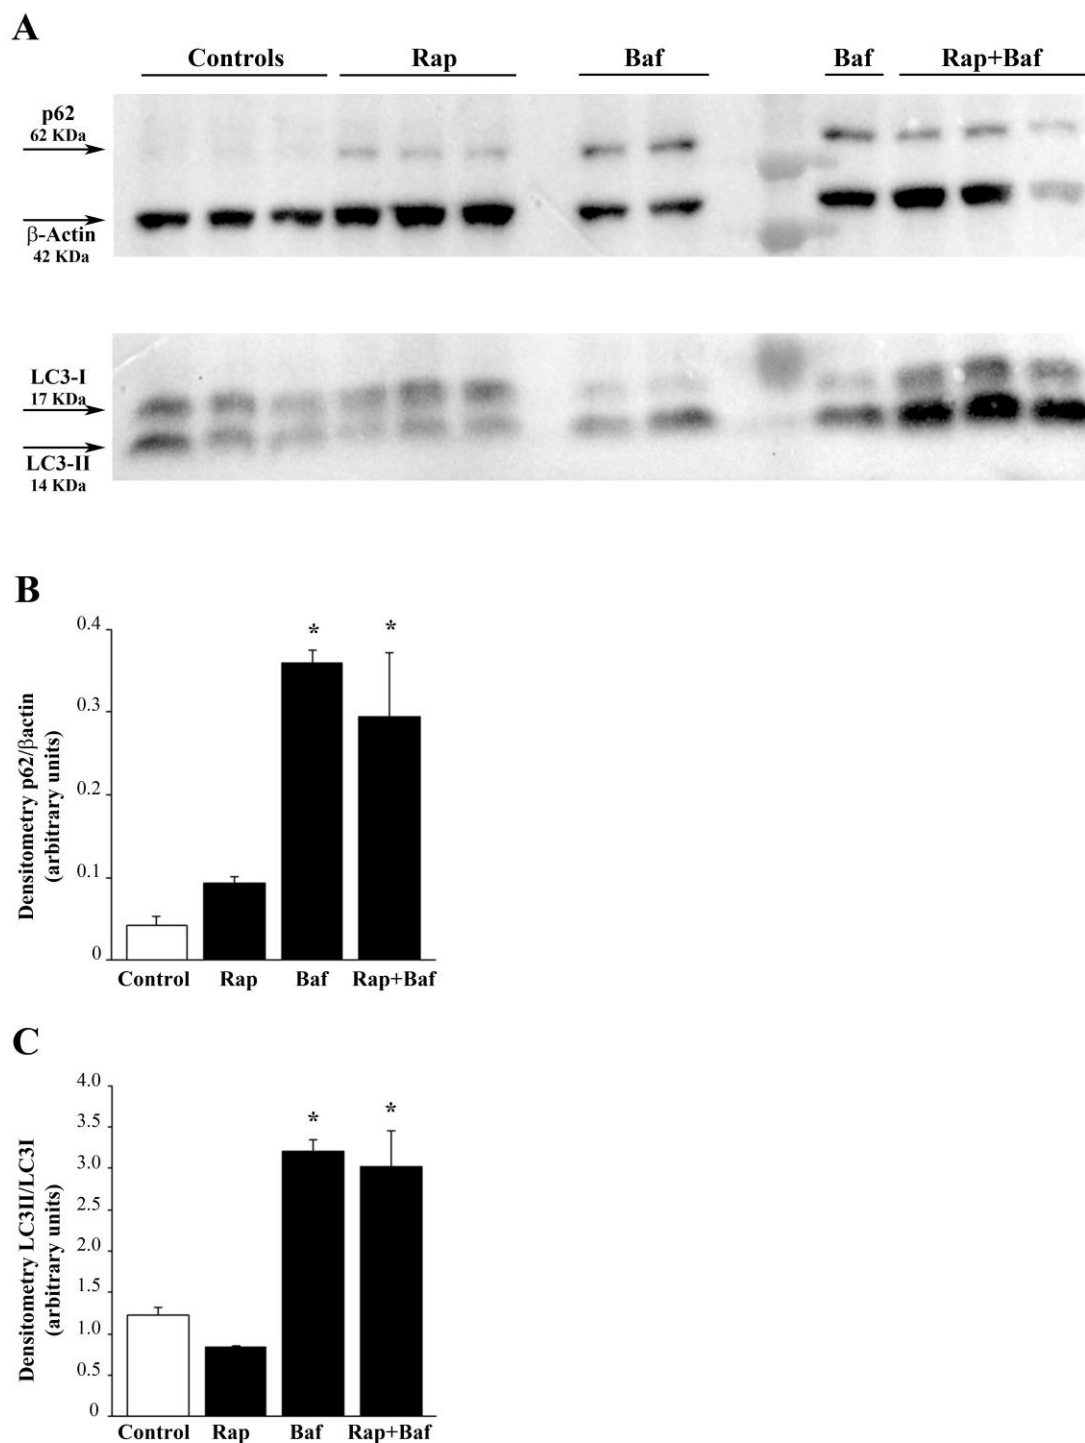

**Figure S7.** Rapamycin effects on the autophagy flux at 14 days in A172 cells. (A) A172 cells were treated with 10 nM rapamycin and western blot analysis of p62 and LC3-II was performed 14 days after its removal; in some samples bafilomycin (100 nM) was added during the last 3 h in both untreated and rapamycin-treated cultures. Densitometric analysis of the level of p62 compared with the house-keeping  $\beta$ -actin (B) and LC3-II compared with LC3-I (C) are shown. Values are given as the mean  $\pm$  S.E.M. from three samples per experimental group. \* $p < 0.05$  compared with controls.

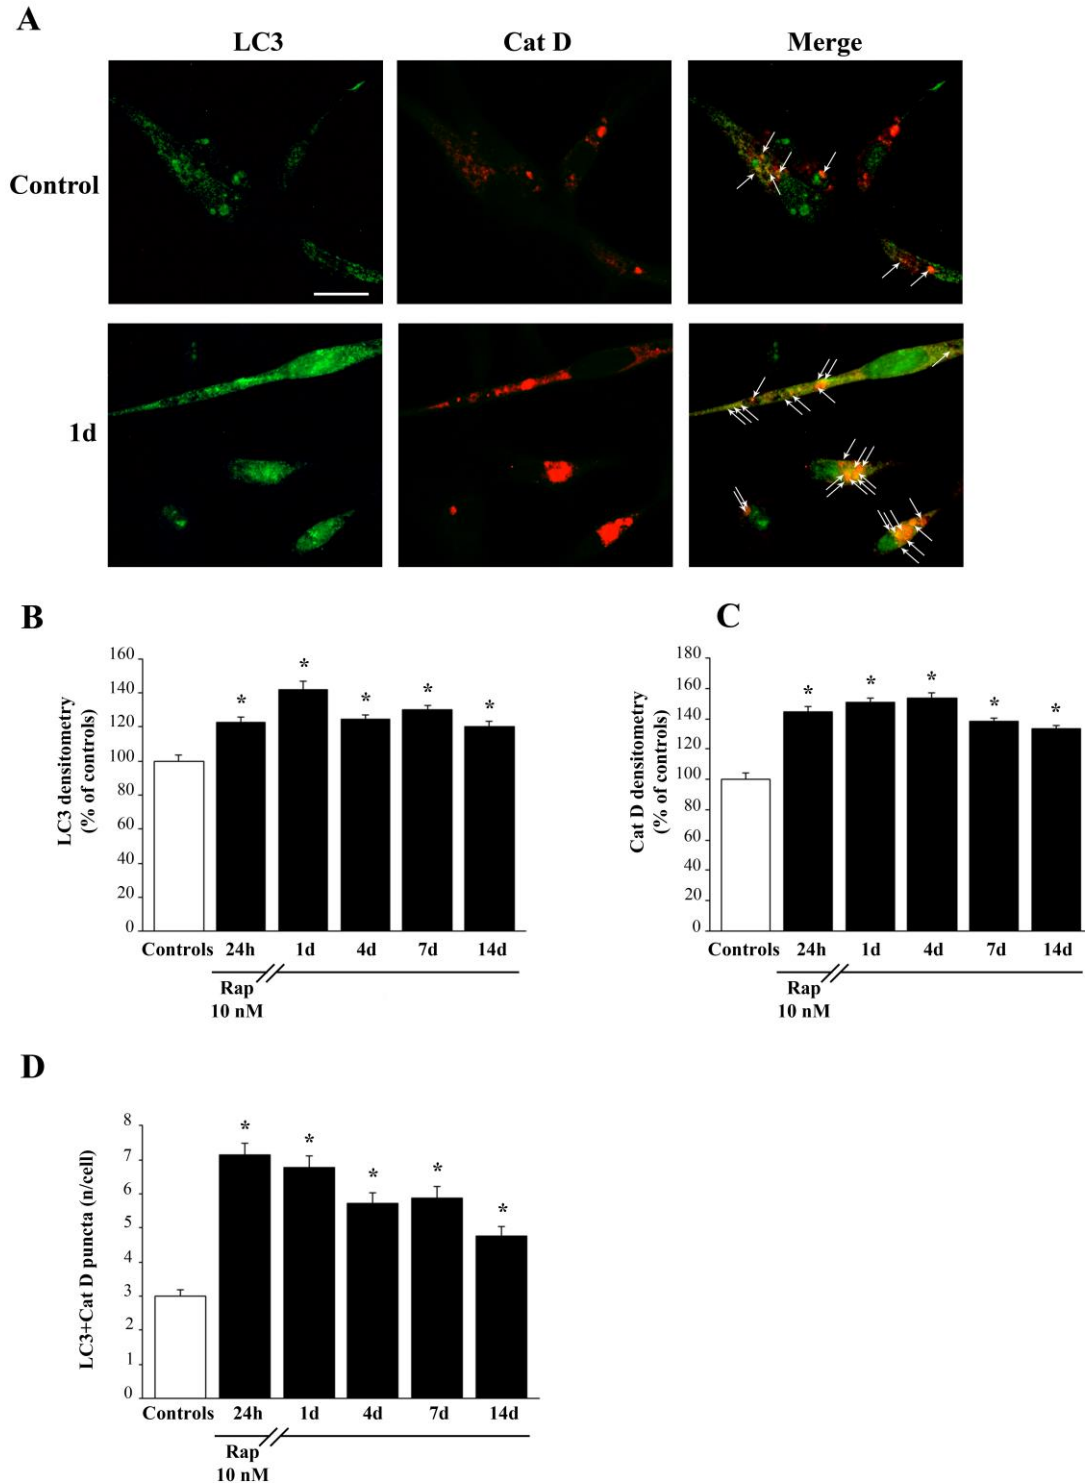

**Figure S8.** Rapamycin increases immuno-fluorescent puncta positive for LC3+Cat D in A172 cells. (A) Representative immuno-fluorescent pictures of the autophagy markers LC3 and Cat D and their merging. Arrows point to merging (yellow) puncta. Graphs report: (B) LC3 fluorescent density, (C) Cat D fluorescent density, and (D) LC3+Cat D merging puncta. Counts report means  $\pm$  S.E.M. from three independent experiments. \* $p < 0.05$  compared with controls. Scale bar=14  $\mu$ m.



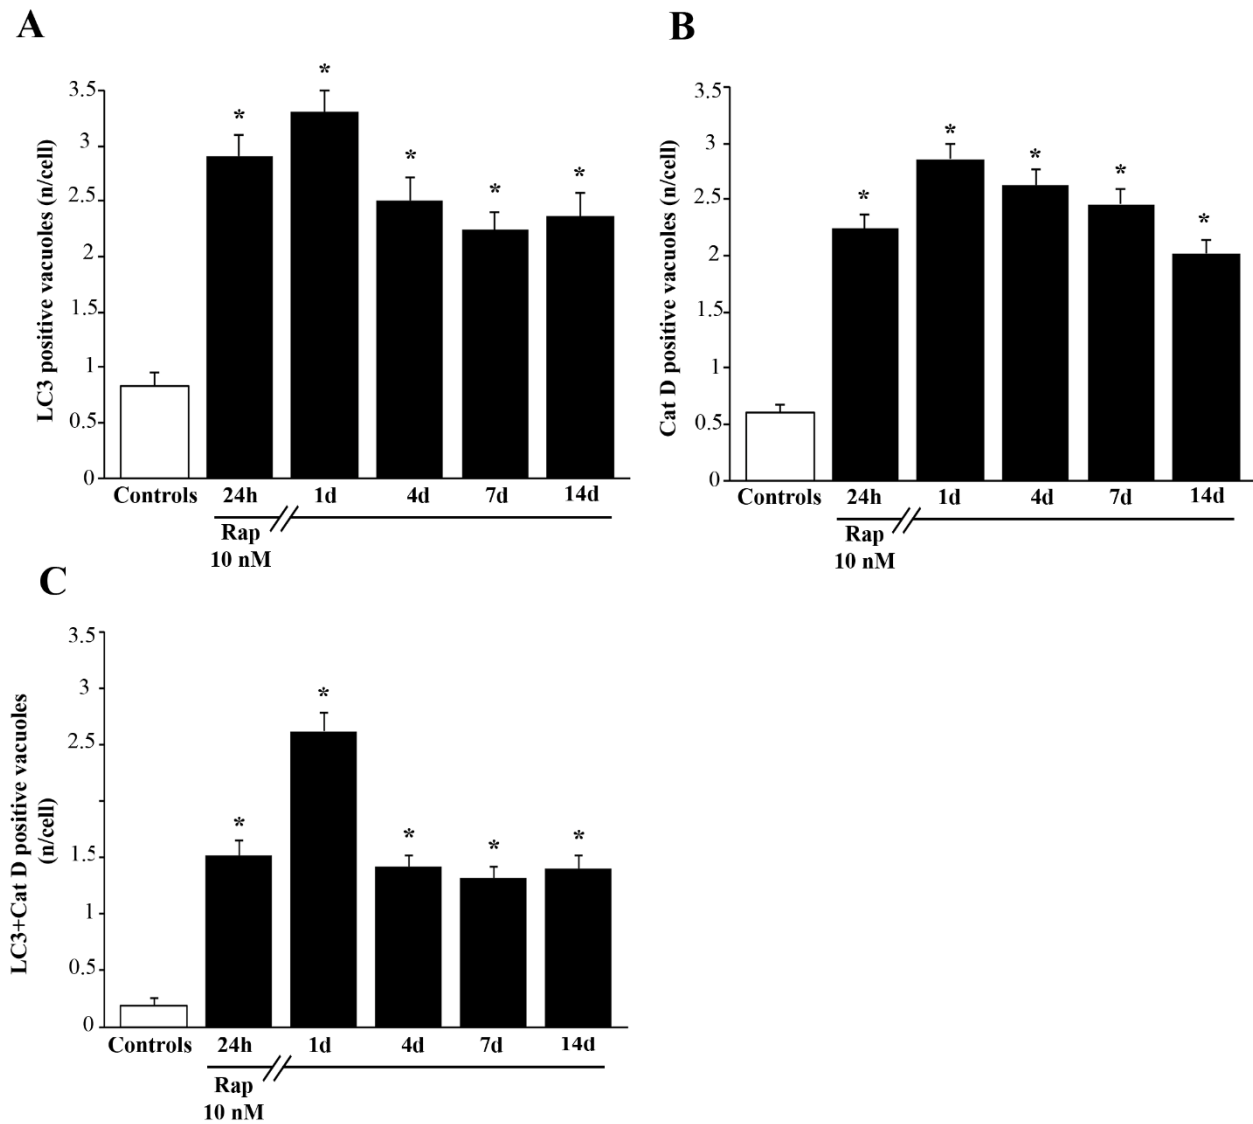

**Figure S9.** Rapamycin induces both autophagosomes and lysosomes and increases the merging between these compartments in U87MG cells. Graphs report ultrastructural morphometry of **(A)** the number of LC3 positive vacuoles (autophagosomes), **(B)** the number of Cat D positive vacuoles (lysosomes) and **(C)** the number of LC3+Cat D positive vacuoles (autophagolysosomes) in U87MG cells in control conditions and at various times after rapamycin treatment. Values are given as the mean $\pm$ S.E.M. from N=50 cells per group. \* $p<0.05$  compared with controls.

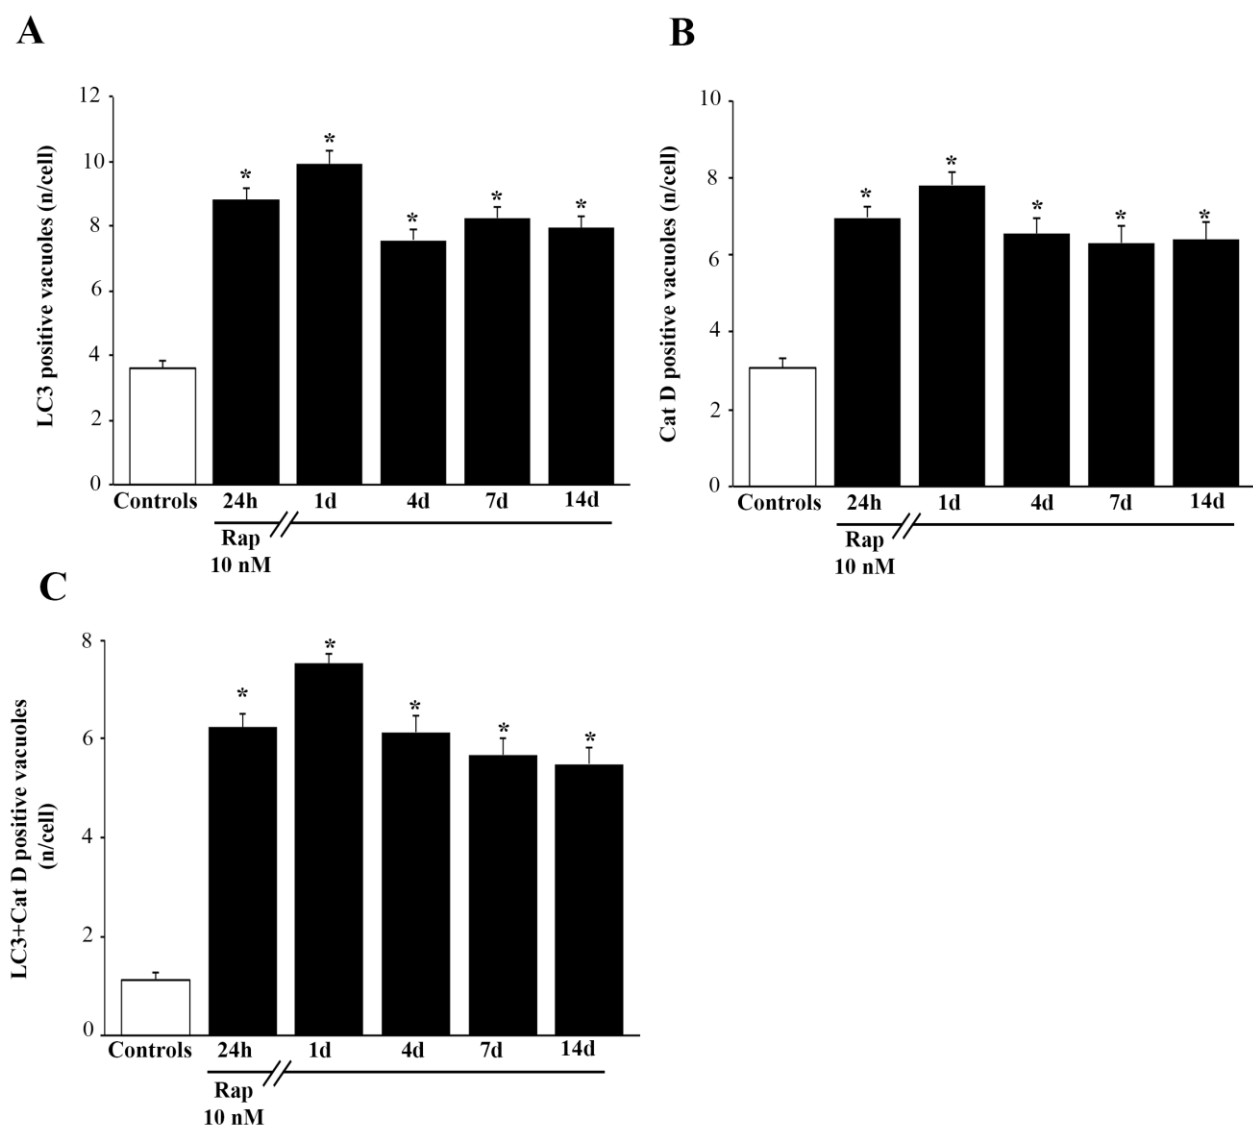

**Figure S10.** Rapamycin induces both autophagosomes and lysosomes and increases the merging between these compartments in A172 cells. Graphs report ultrastructural morphometry of **(A)** the number of LC3 positive vacuoles (autophagosomes), **(B)** the number of Cat D positive vacuoles (lysosomes) and **(C)** the number of LC3+Cat D positive vacuoles (autophagolysosomes) in A172 cells in control conditions and at various times after rapamycin treatment. Values are given as the mean $\pm$ S.E.M. from N=50 cells per group. \* $p<0.05$  compared with controls.

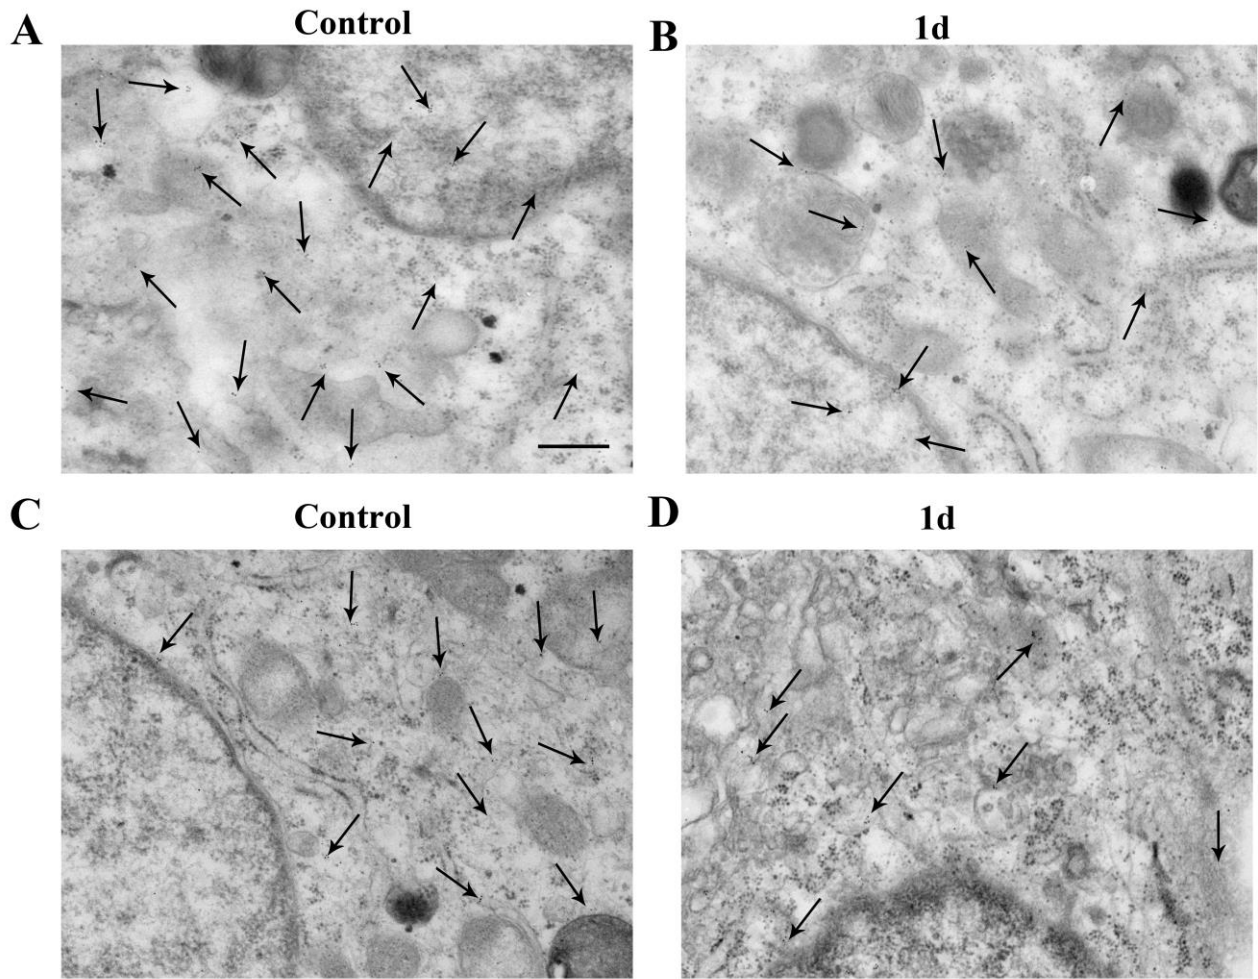

**Figure S11.** Rapamycin decreases PrPc protein in the cytoplasm of A172 cells. Representative TEM micrographs showing a PrPc- or PrPsc-like stained control cell (**A** and **C**, respectively) and a cell following 1d of rapamycin withdrawal (**B** and **D**, respectively). Arrows point to PrPc/PrPsc-like immuno-gold particles within the cytosol. Scale bar= 170 nm.

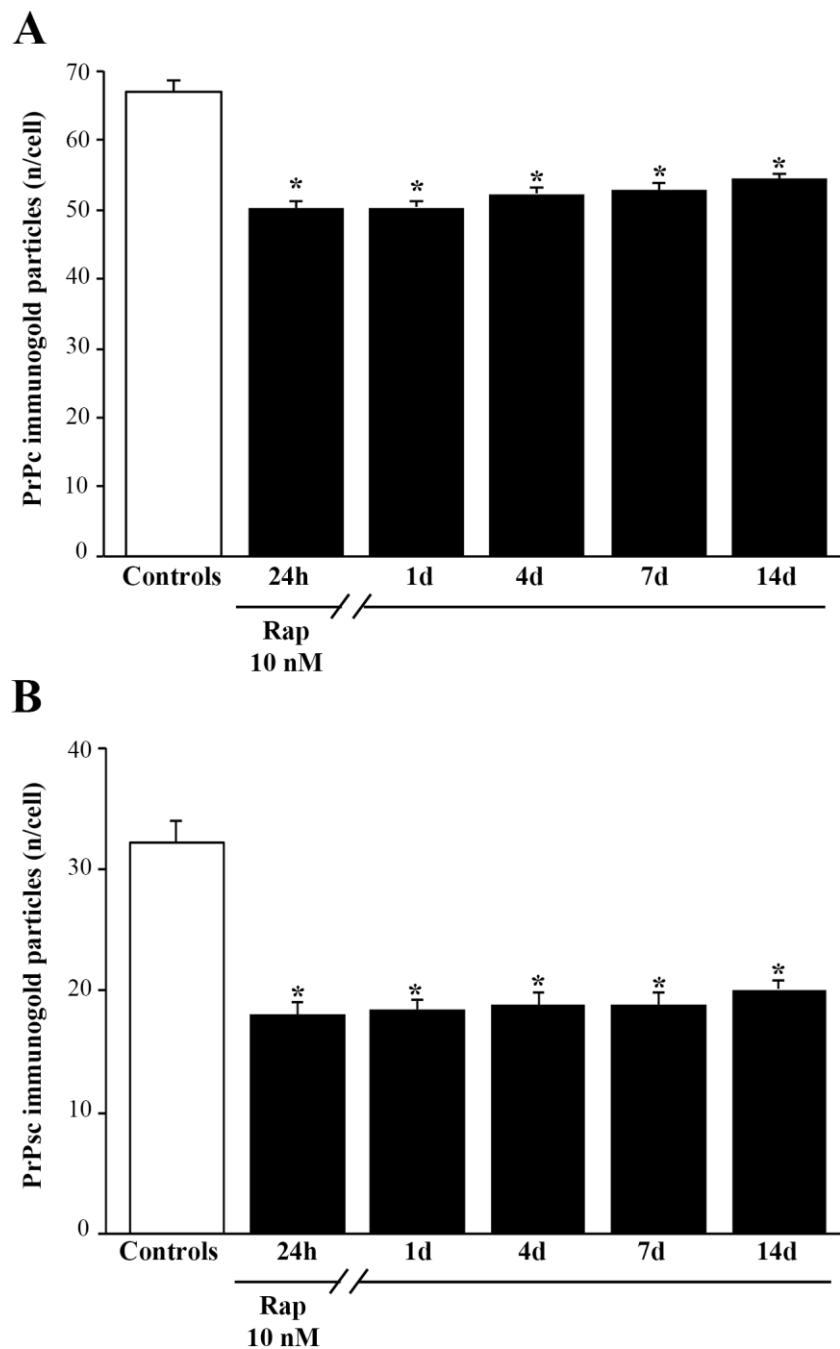

**Figure S12.** Rapamycin decreases PrPc and PrPsc-like proteins in the cytoplasm of A172 cells. Graphs report the quantitative ultrastructural morphometry for PrPc (**A**) and PrPsc-like (**B**) immuno-gold particles within the cytosol. Counts represent the mean $\pm$ S.E.M from N=50 cells per group. \*p<0.05 compared with control.

**A**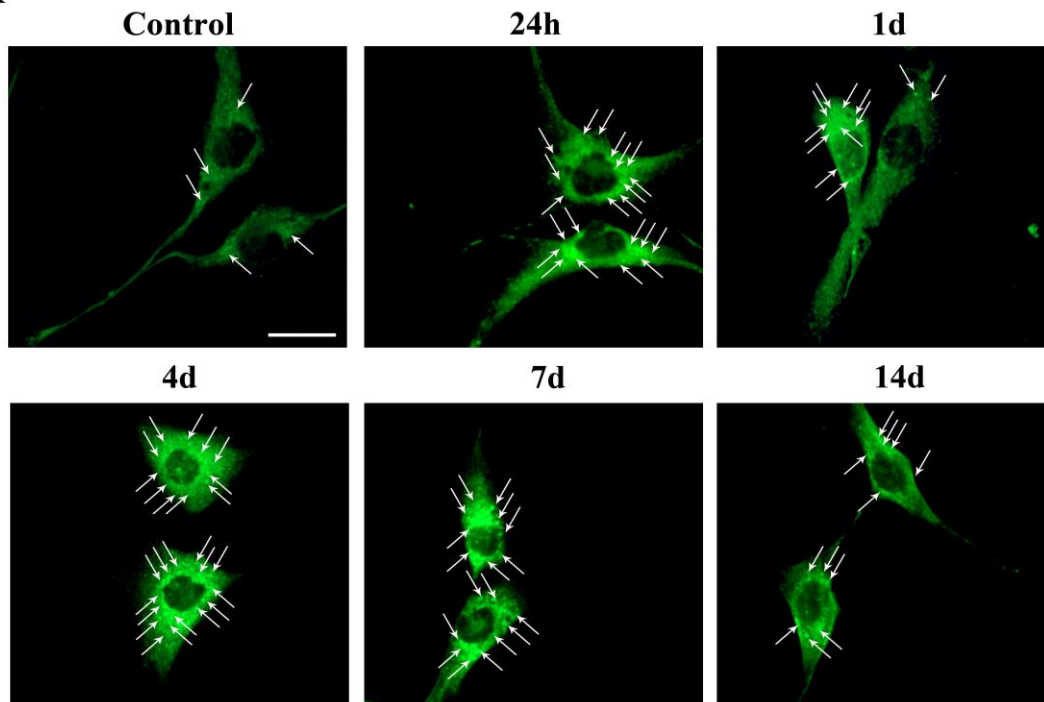**B**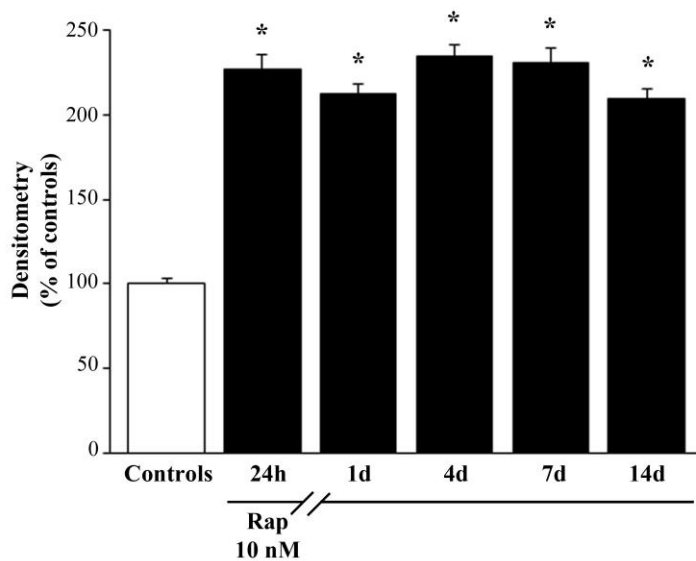

**Figure S13.** Rapamycin persistently increases the MTR-G fluorescence in A172 cells. **(A)** Representative pictures showing total mitochondria stained with MTR-G from controls, rapamycin-treated cells (10 nM) for 24h and after rapamycin withdrawal (up to 14d). Arrows indicate intense fluorescence within the cells. **(B)** Graph reports the increase in mitochondrial fluorescence induced by rapamycin, which persists unmodified for 14 days. Values are given as the mean $\pm$ S.E.M from N=100 cells per group \*p<0.05 compared with control. Scale bar=15  $\mu$ m.

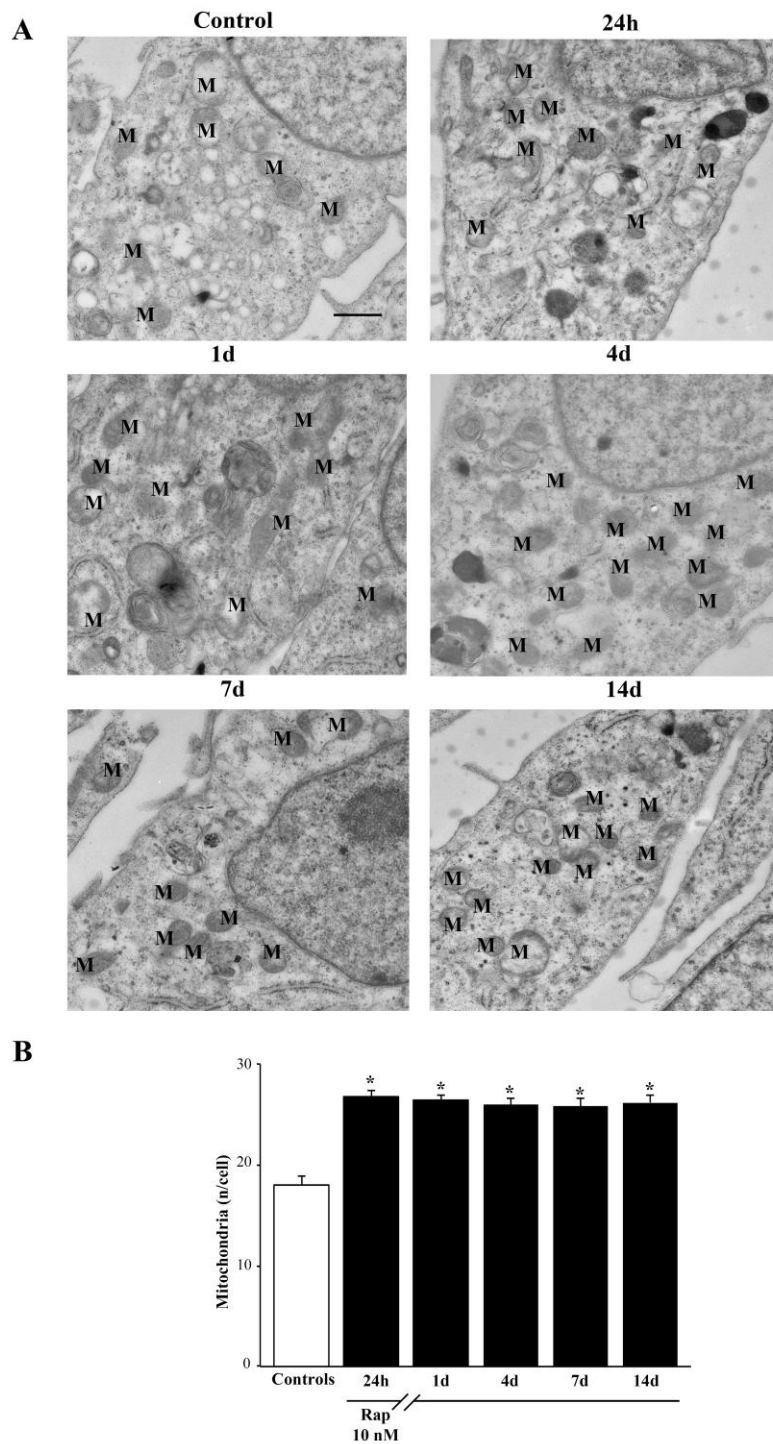

**Figure S14.** Rapamycin persistently increases the number of mitochondria in A172 cells. **(A)** Representative pictures at TEM show the increase in mitochondria (M) counted directly as specific organelles. **(B)** Graph reports the number of mitochondria per cell counted at TEM, which similarly persists at 14 days. Values are given as the mean $\pm$ S.E.M from N=50 cells per group. \* $p$ <0.05 compared with control. Scale bar=260 nm.

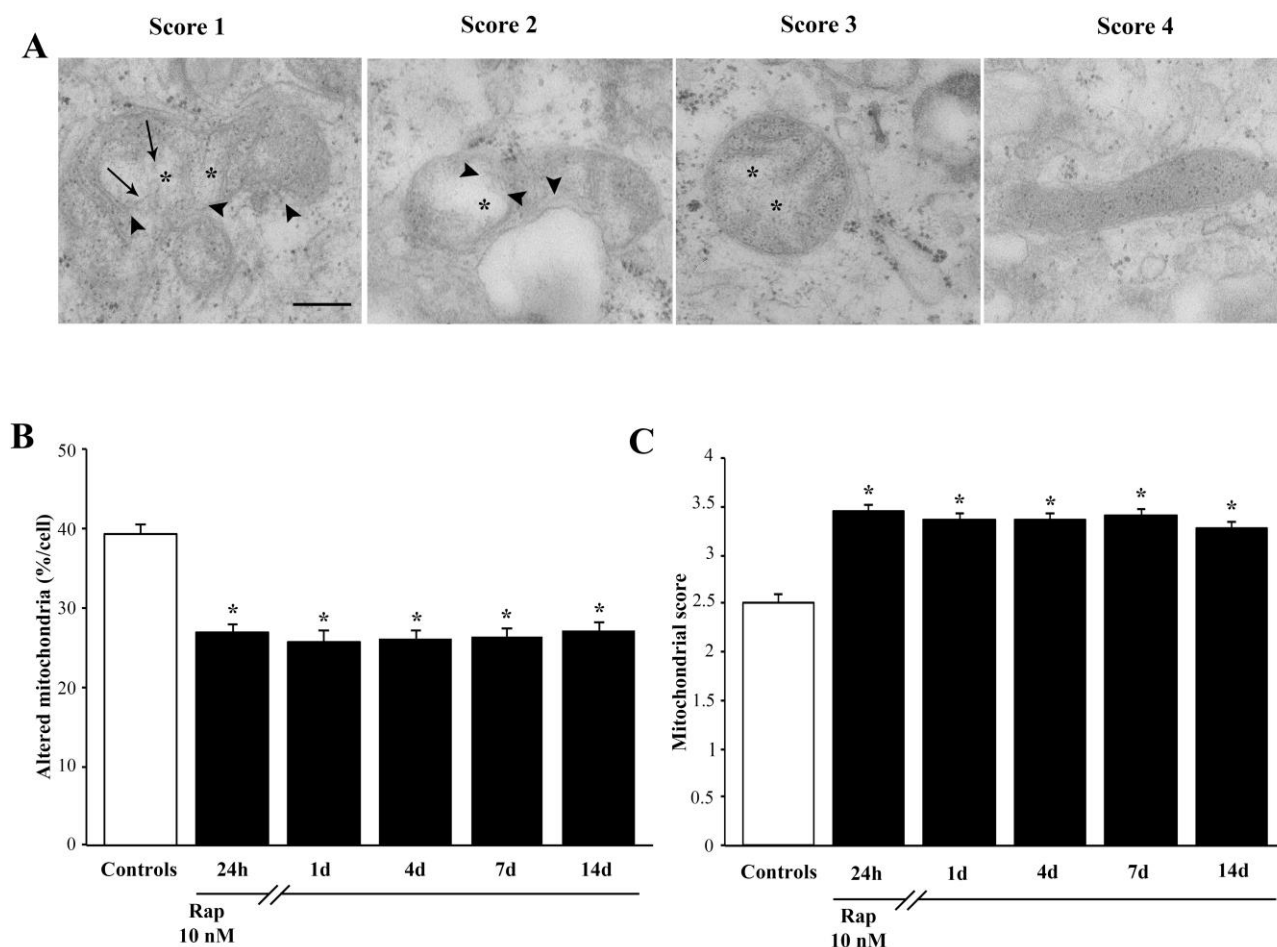

**Figure S15.** Rapamycin long-lasting rescues altered mitochondria in A172 cells. **(A)** Representative ultrastructural pictures of mitochondria, showing specific morphological features which are evaluated based on the modified scale from Flameng et al. 1980 [23] (see the main manuscript for the meaning of the score). Graph **(B)** reports the percentage of altered mitochondria (including all kinds of alterations). Graph **(C)** reports the average of mitochondrial score. Values are given as **(B)** the percentage $\pm$ S.E.M from N=50 cells per group or **(C)** the mean mitochondrial morphological score $\pm$ S.E.M calculated by averaging mitochondrial scores from at least 150 mitochondria from each experimental group. \* $p < 0.05$  compared with controls. Scale bar=140 nm.

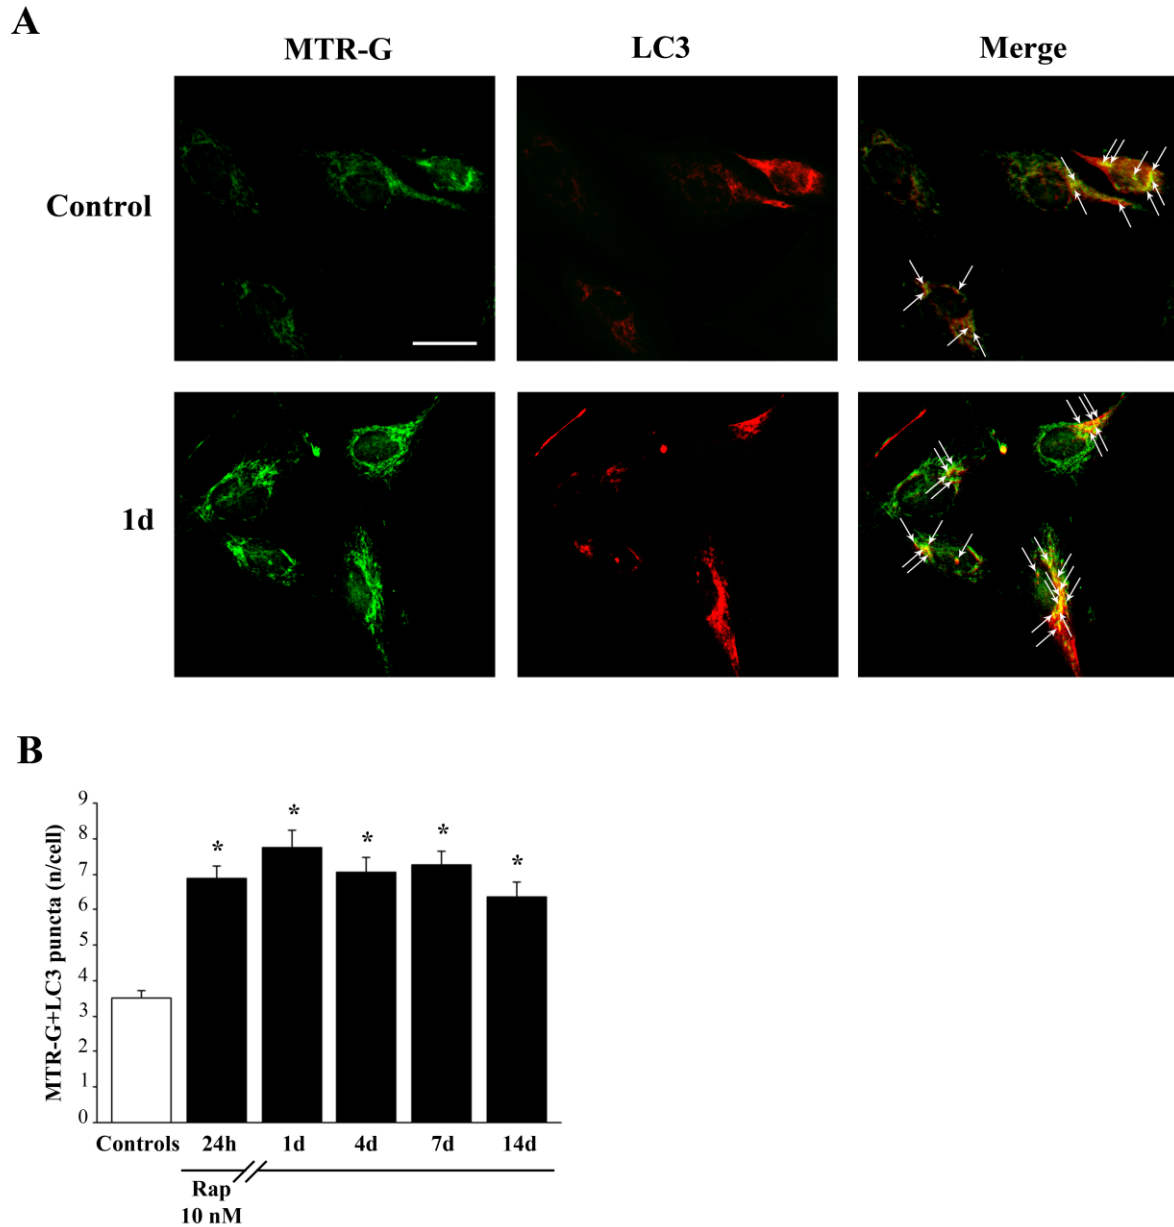

**Figure S16.** Rapamycin increases the merging of MTR-G with LC3 in A172 cells. **(A)** Representative pictures showing that rapamycin increases the MTR-G fluorescence along with LC3 immuno-fluorescence. Arrows point to merging (yellow) puncta. **(B)** Graph reports the rapamycin-induced increase in MTR-G+LC3 merging puncta, which persists up to 14 d. Data are given as the mean±S.E.M. from N=100 cell per group. \*p<0.05 compared with controls. Scale bar=18  $\mu$ m.



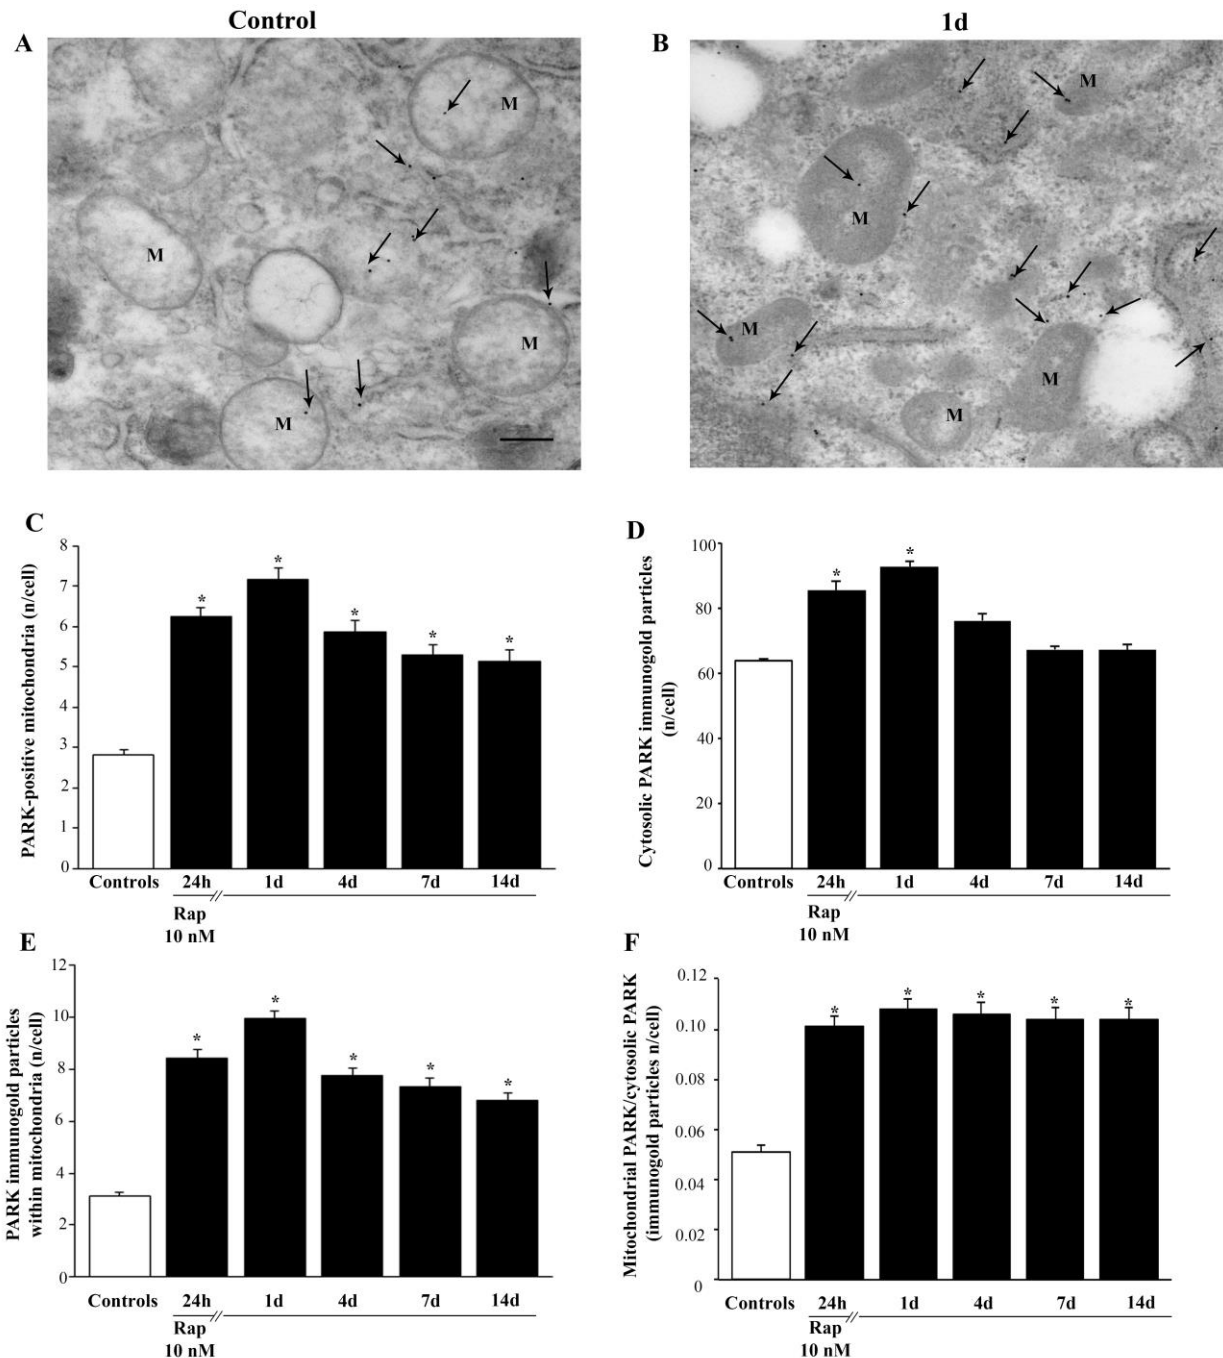

**Figure S17.** Rapamycin increases PARK immuno-gold particles in U87MG cells. Representative micrographs showing PARK immuno-gold in U87MG cells of control (A) and after 1d of rapamycin withdrawal (B). Graphs report: (C) PARK-positive mitochondria, (D) PARK immuno-gold particles within the cytosol, (E) PARK immuno-gold particles within mitochondria, and (F) the ratio of mitochondrial to cytosolic PARK particles. Values are given as the mean±S.E.M. from N=50 cells per group. \*p<0.05 compared with controls. Scale bar=230 nm.

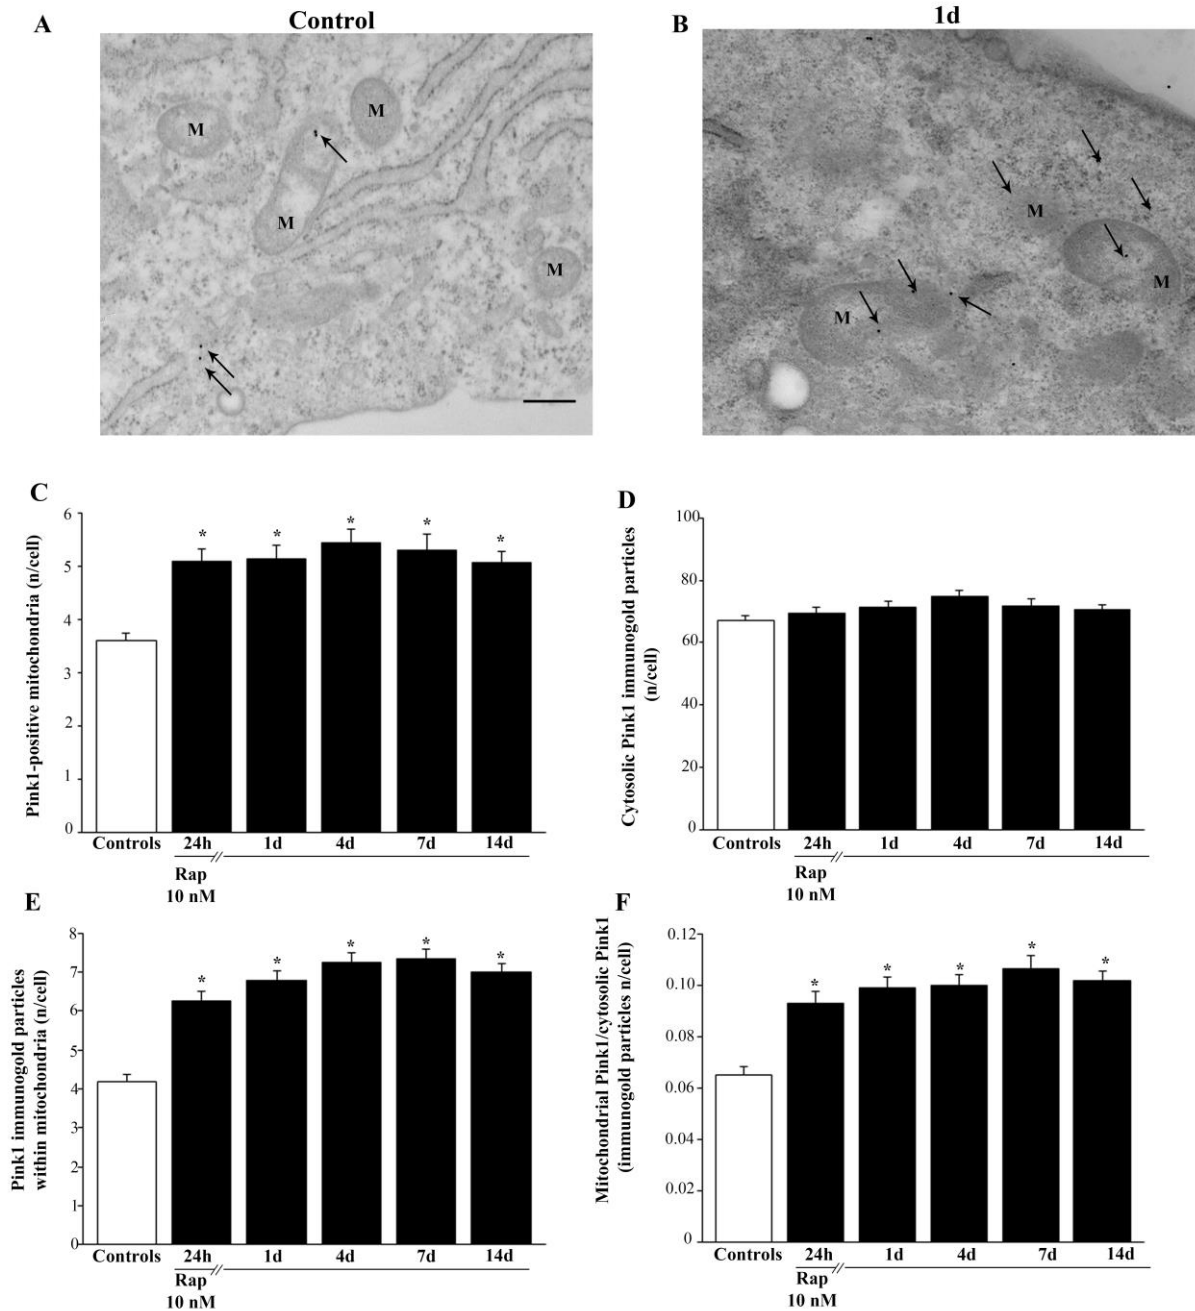

**Figure S18.** Rapamycin increases Pink1 immuno-gold particles within mitochondria of U87MG cells. Representative micrographs showing Pink1 immuno-gold in U87MG cells of control (A) and after 1d of rapamycin withdrawal (B). Graphs report: (C) Pink1-positive mitochondria, (D) Pink1 immuno-gold particles within the cytosol, (E) Pink1 immuno-gold particles within mitochondria, and (F) the ratio of mitochondrial to cytosolic Pink1 particles. Values are given as the mean±S.E.M. from N=50 cells per group. \*p<0.05 compared with controls. Scale bar=230 nm.

**A**

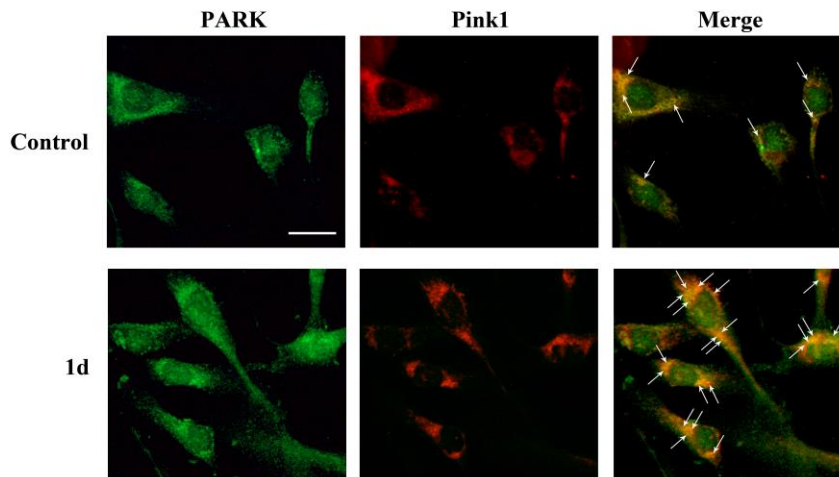

**B**

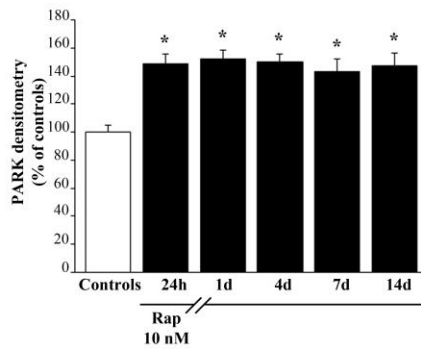

**C**

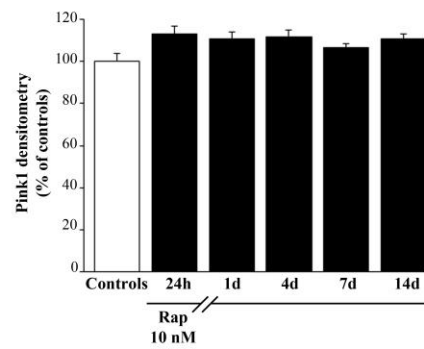

**D**

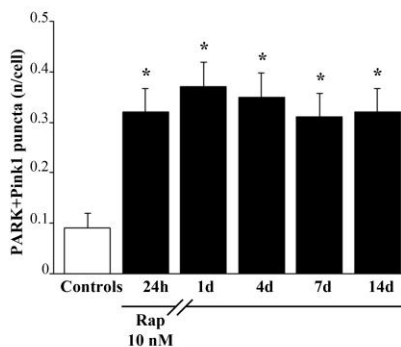

**Figure S19.** Rapamycin increases the merging of parkin (PARK) and Pink1 immunofluorescence in A172 cells. **(A)** Representative pictures showing the mitophagy markers PARK and Pink1 from control and rapamycin-treated cells (10 nM at 1 day). Arrows point to merging (yellow) puncta. The graph report: **(B)** a long-lasting significant increase of PARK immunofluorescence following rapamycin, **(C)** a no significant effect of rapamycin on Pink1 immunofluorescence at any time interval, and **(D)** a significant increase in the number of puncta positive for both PARK and Pink1, which exceeds at large the increase induced in PARK immunofluorescence alone. Data are given as the mean $\pm$ S.E.M. from N=100 cells per group. \* $p < 0.05$  compared with controls. Scale bar = 20  $\mu$ m.

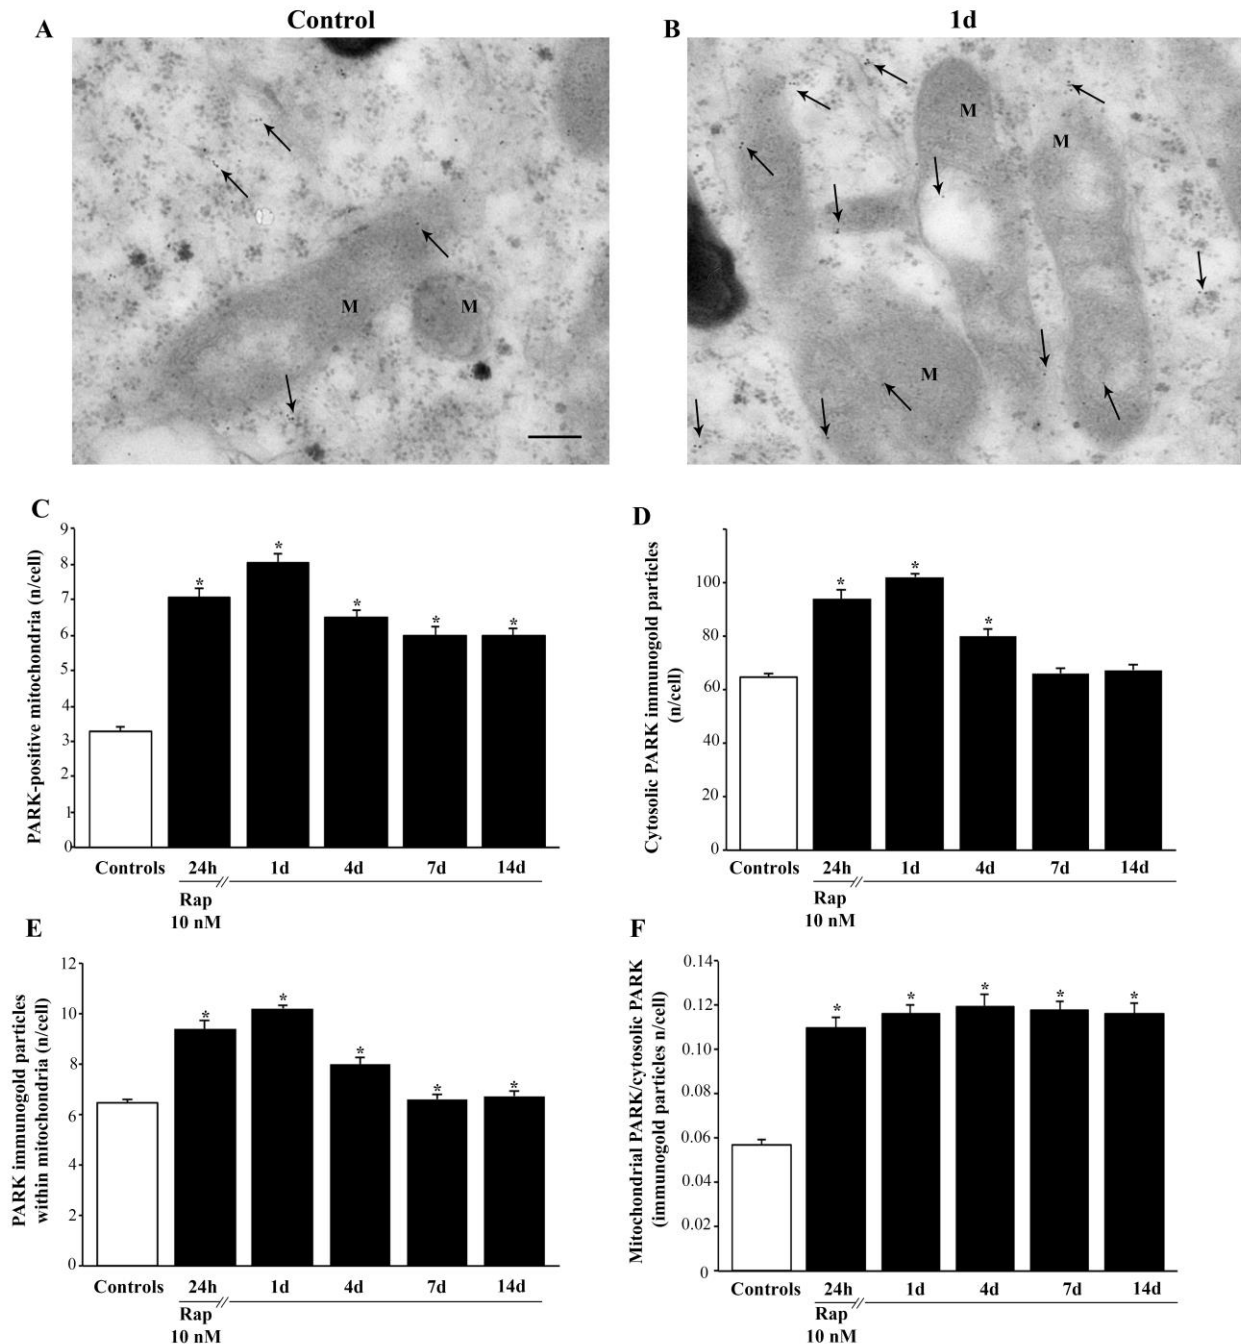

**Figure S20.** Rapamycin increases PARK immuno-gold particles in A172 cells. Representative micrographs showing PARK immuno-gold in A172 cells of control (A) and after 1d of rapamycin withdrawal (B). Graphs report: (C) PARK-positive mitochondria, (D) PARK immuno-gold particles within the cytosol, (E) PARK immuno-gold particles within mitochondria, and (F) the ratio of mitochondrial to cytosolic PARK particles. Values are given as the mean $\pm$ S.E.M. from N=50 cells per group. \*p<0.05 compared with controls. Scale bar=140 nm.

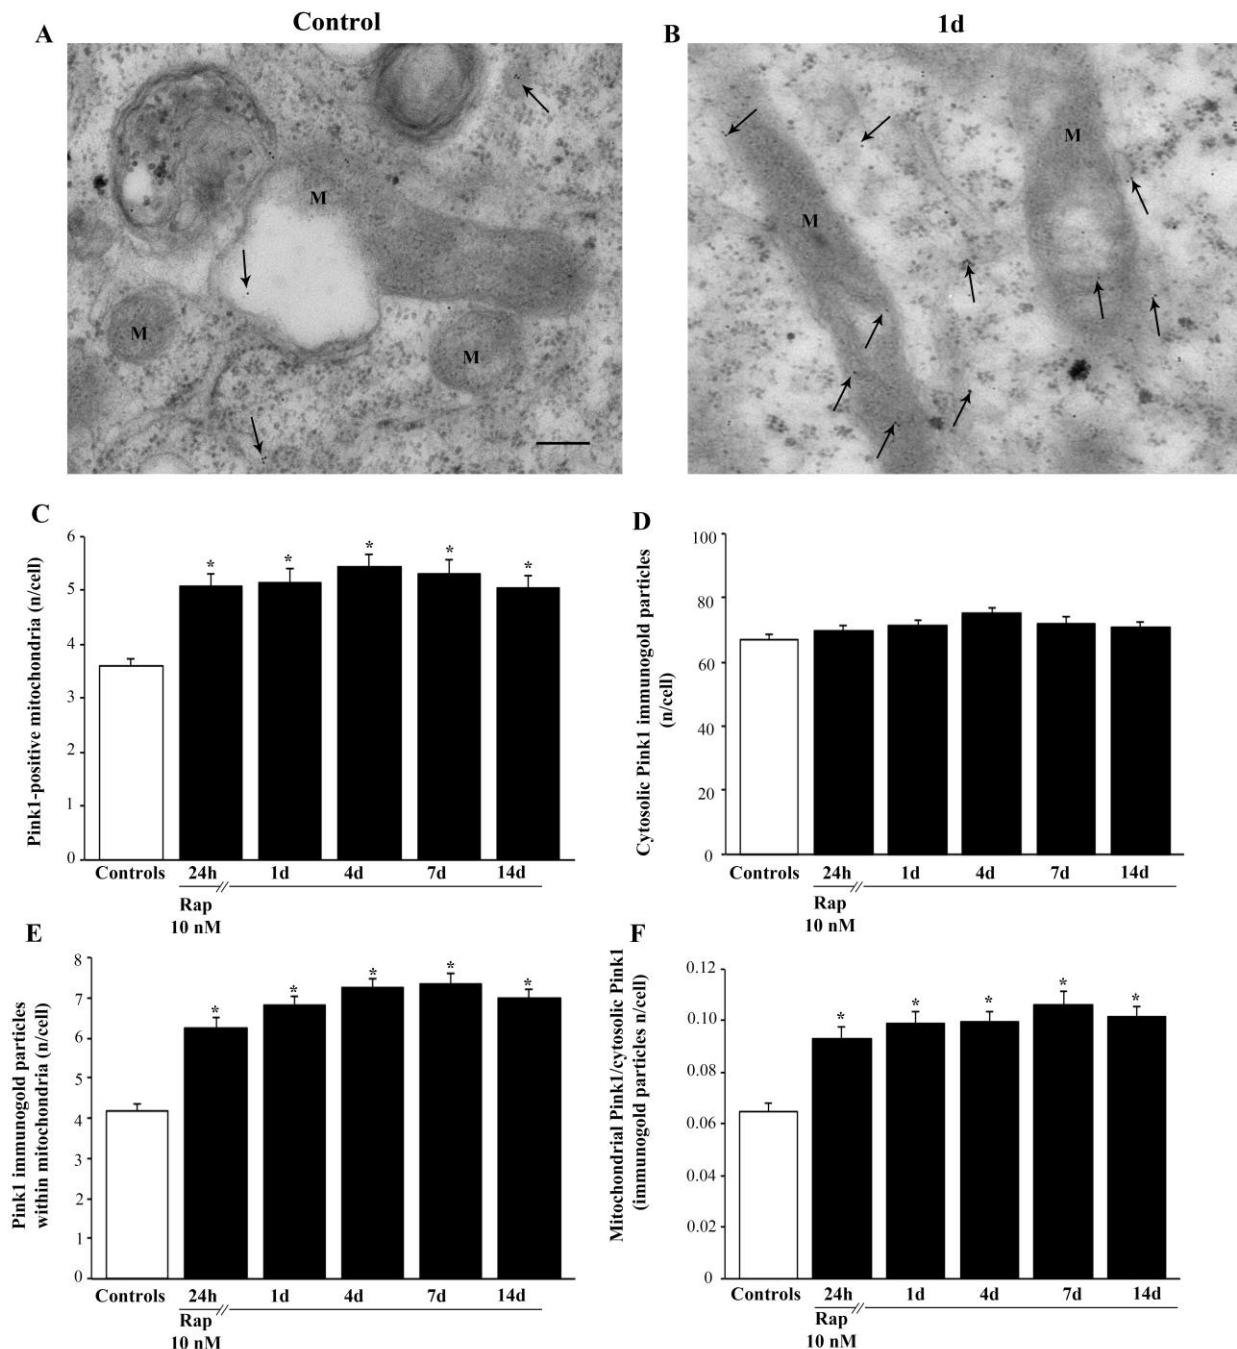

**Figure S21.** Rapamycin increases Pink1 immuno-gold particles within mitochondria of A172 cells. Representative micrographs showing Pink1 immuno-gold in A172 cells of control (A) and after 1d of rapamycin withdrawal (B). Graphs report (C) Pink1-positive mitochondria, (D) Pink1 immuno-gold particles within the cytosol, (E) Pink1 immuno-gold particles within mitochondria, and (F) the ratio of mitochondrial to cytosolic Pink1 particles. Values are given as the mean±S.E.M. from N=50 cells per group. \*p<0.05 compared with controls. Scale bar=140 nm.

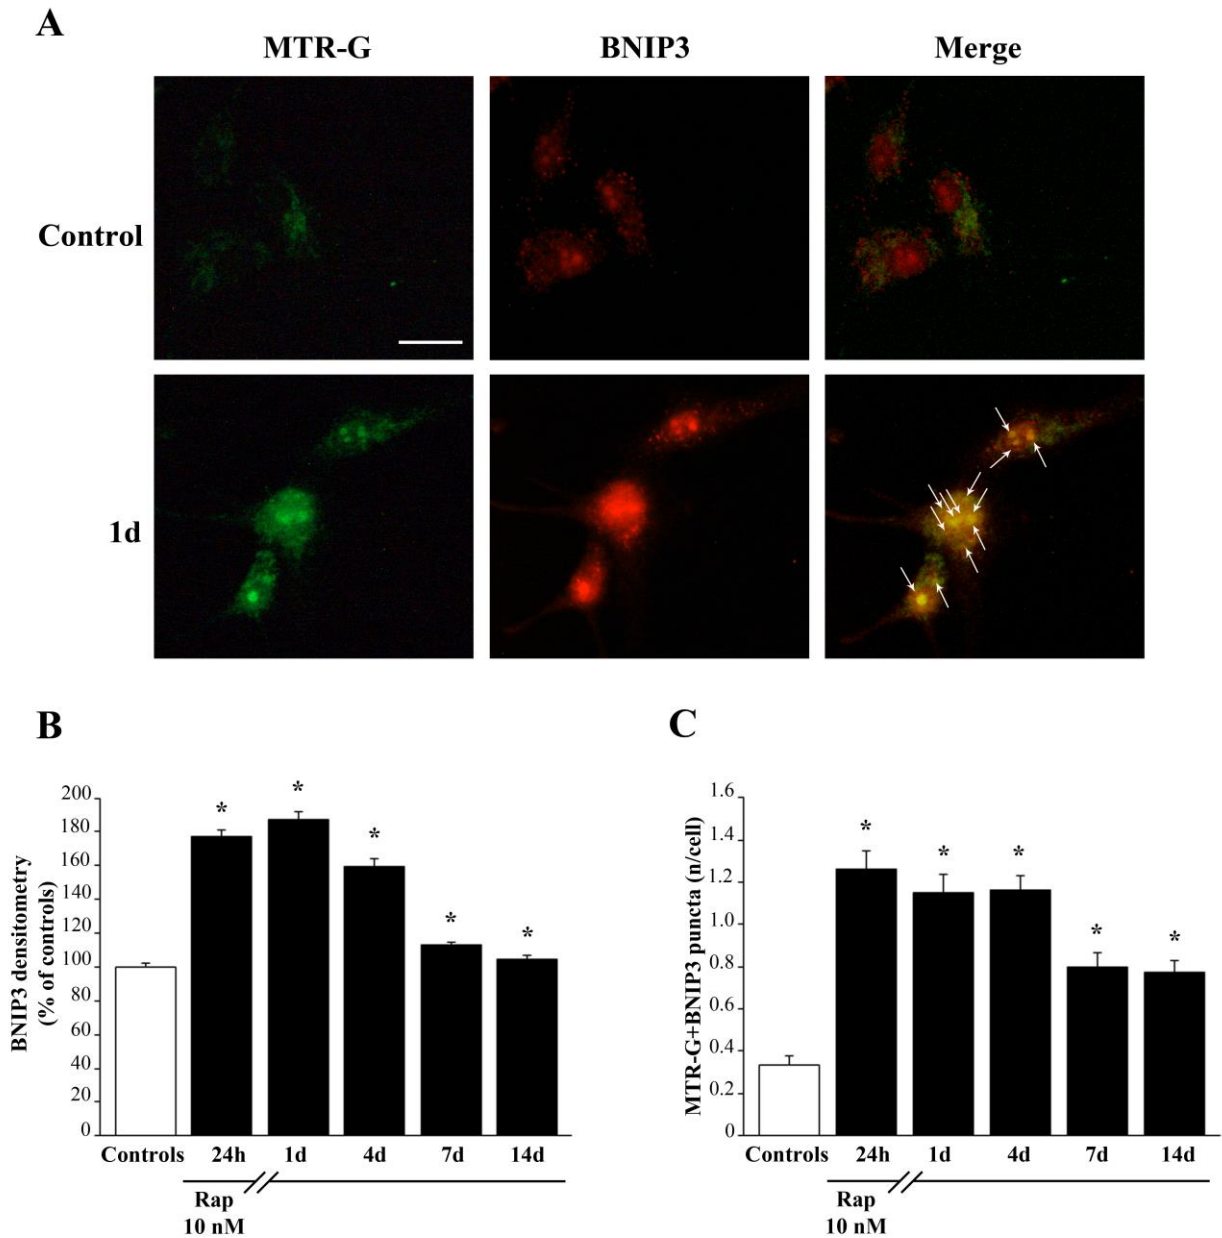

**Figure S22.** Rapamycin increases the merging of MTR-G with BNIP3 in A172 cells. (A) Representative pictures showing that rapamycin increases MTR-G fluorescence along with LC3 immunofluorescence compared with control. Arrows point to merging (yellow) puncta. (B) Graph reports the rapamycin-induced long-lasting increase in BNIP3 immunofluorescence. (C) Graph reports the rapamycin-induced long-lasting increase in MTR-G+BNIP3 merging puncta. Data are given as the mean±S.E.M. from N=100 cells per group. \*p<0.05 compared with controls. Scale bar=30  $\mu$ m.

**A**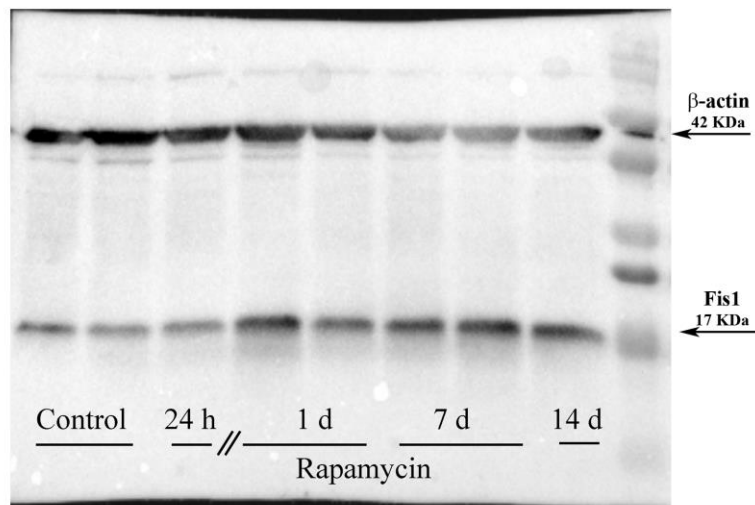**B**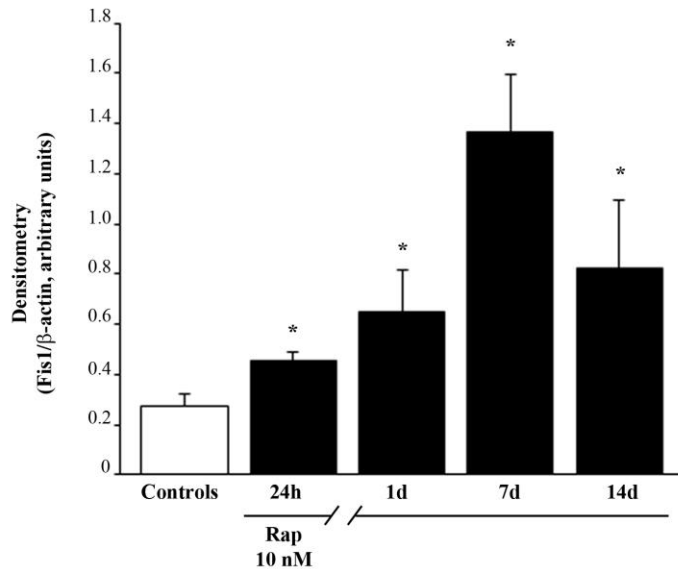

**Figure S23.** Rapamycin increases the fission protein marker Fis1. **(A)** Representative western blotting of Fis1 protein. **(B)** Graph reports the rapamycin-induced increase of the levels of Fis1 at all time intervals. Values are given as the mean $\pm$ S.E.M. from at least 4 samples per group. \* $p\leq 0.05$  compared with controls.

**A**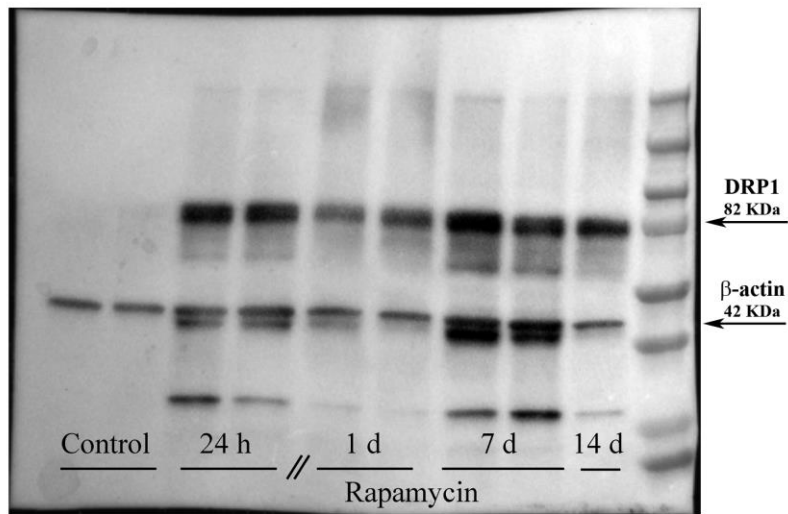**B**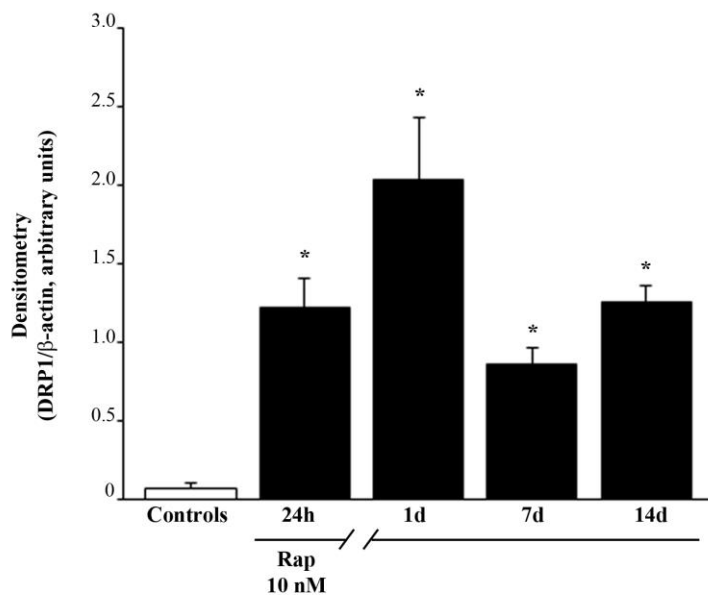

**Figure S24.** Rapamycin increases the fission protein marker DRP1. **(A)** Representative western blotting of DRP1 protein. **(B)** Graph reports the rapamycin-induced increase of the levels of DRP1 at all time intervals. Values are given as the mean $\pm$ S.E.M. from at least 3 samples per group. \* $p \leq 0.05$  compared with controls.



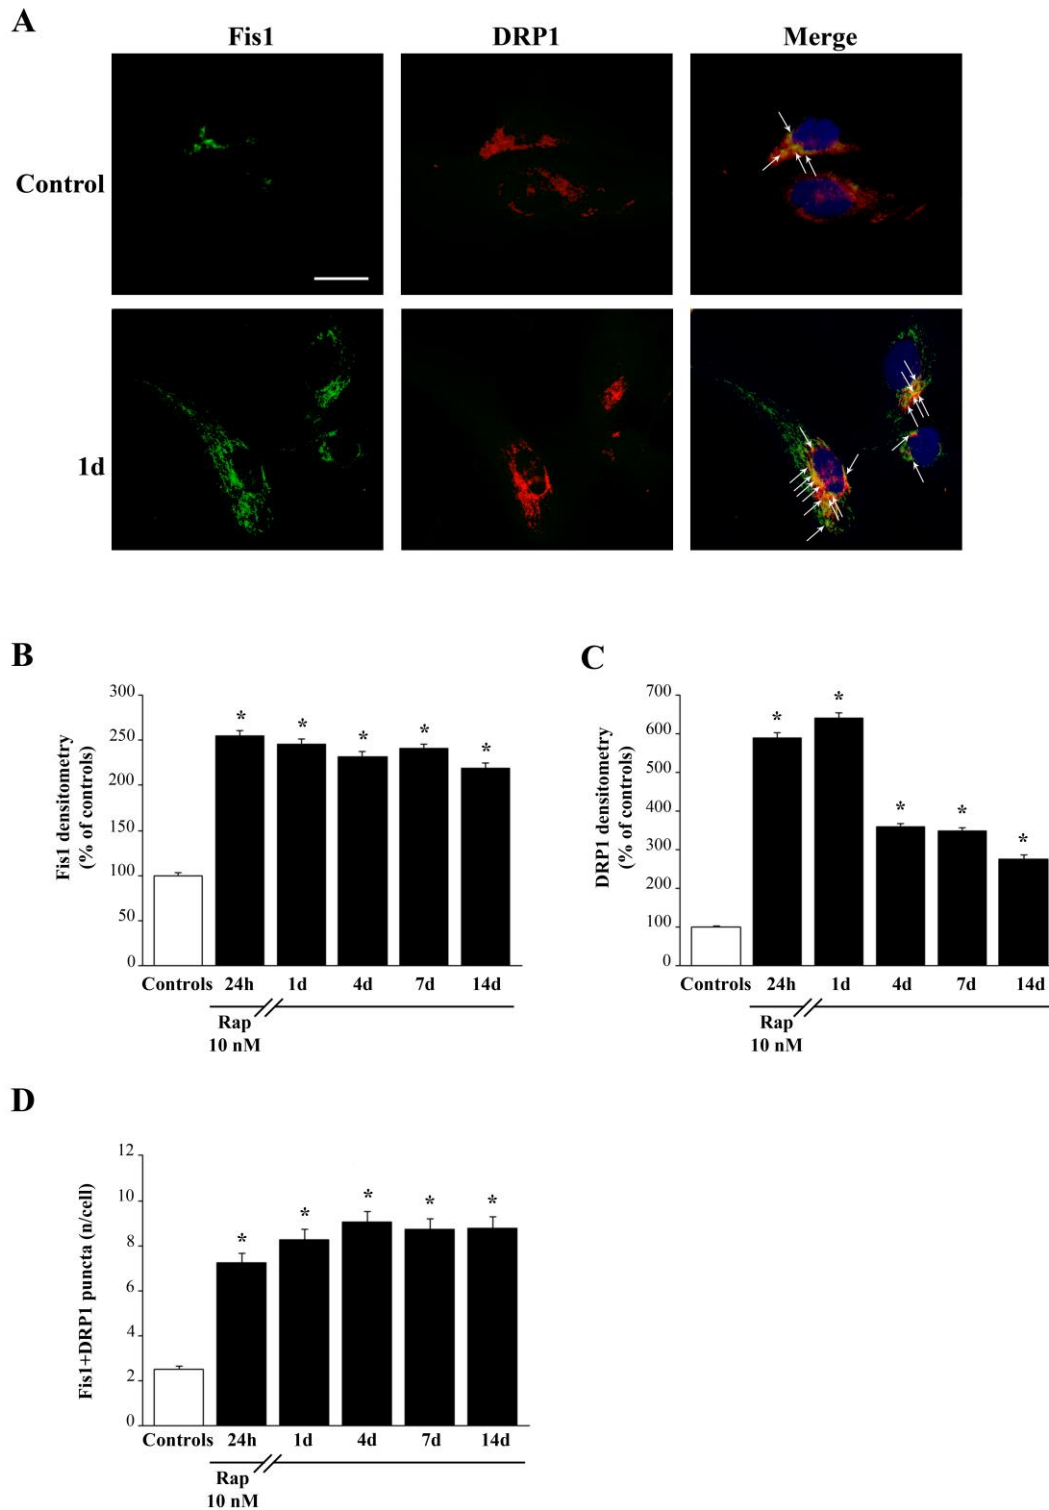

**Figure S25.** Rapamycin increases immunofluorescence for Fis1 and DRP1 in A172 cells. (A) Representative pictures of the fission markers Fis1 and DRP1. Arrows point to merging (yellow) puncta. Graphs report (B) Fis1 and (C) DRP1 immunofluorescent intensity, while graph (D) reports Fis1+DRP1 merging puncta. Values are given as the mean $\pm$ S.E.M from N=100 cells per group. \*p<0.05 compared with controls. Scale bar=16  $\mu$ m.
